# Supplementary material for: Photoelectron spectra of functionalized adamantanes
Source: Royal Society of Chemistry journal article supplement (doi:10.1039/d4cp02425g), 2024-01-01
Supplement: d4cp02425g1.pdf [file d4cp02425g1.pdf]

## Electronic Supporting Information

### Photoelectron Spectra of Functionalized Adamantanes

Parker Crandall, Simone Stahl, Andrea Merli, Marko Förstel, and Otto Dopfer\*

<sup>1</sup>Institut für Optik und Atomare Physik, Technische Universität Berlin, 10625 Berlin, Germany

\* Corresponding author: dopfer@physik.tu-berlin.de

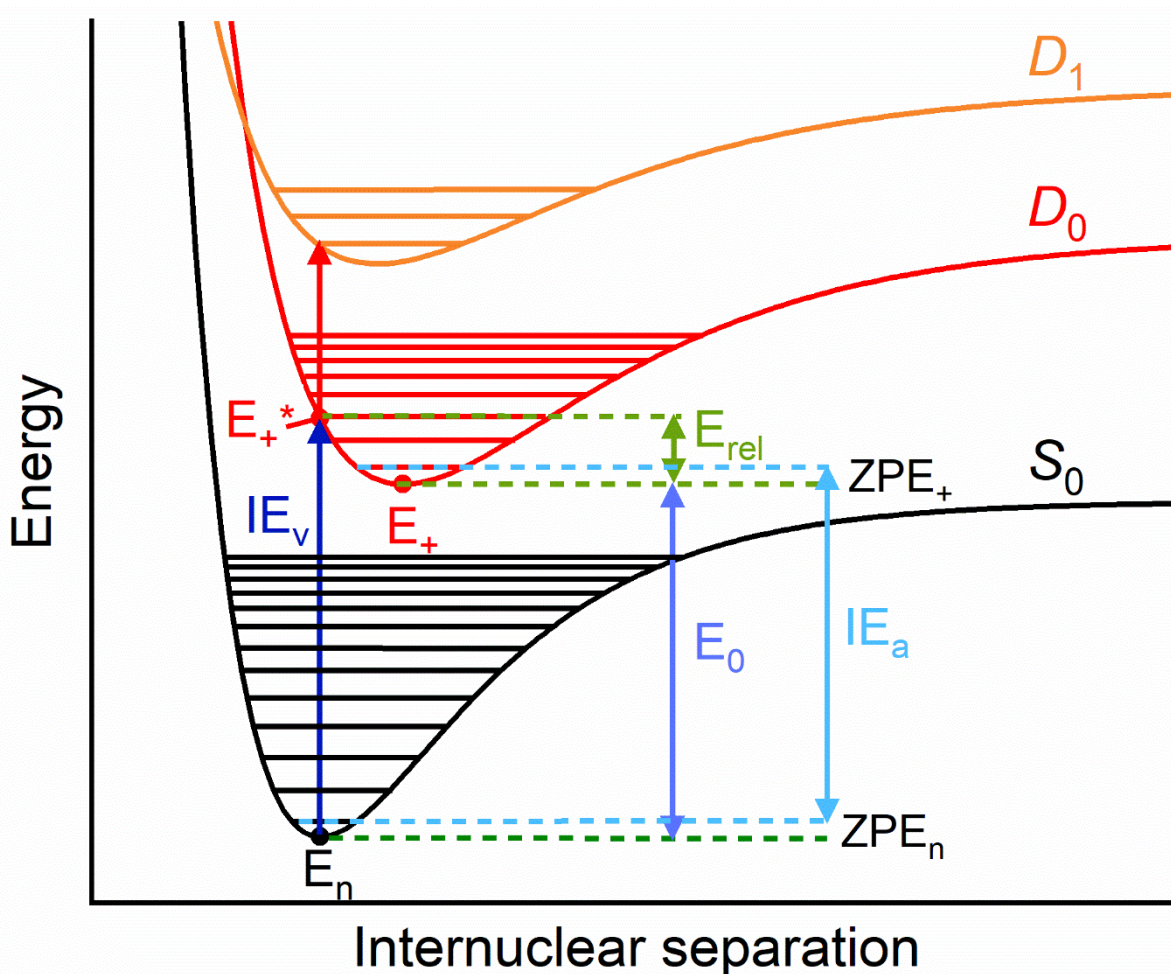

**Figure S1.** Schematic of the Franck-Condon principle illustrating the energy quantities described in section 2.2.

## ADAMANTANE

**Table S1.** Assignment of the PES spectrum of Ada using MO eigenvalues of neutral Ada vs. vertical transition energies of Ada<sup>+</sup> computed at the M06-2X(D3)/cc-pVTZ level.

| Ada MOs <sup>a</sup> |             |        | Ada <sup>+</sup> TD-DFT    |             |       |         |                         |             |       |         |
|----------------------|-------------|--------|----------------------------|-------------|-------|---------|-------------------------|-------------|-------|---------|
| $T_d$                |             |        | Neutral geom. <sup>b</sup> |             |       |         | Opt. geom. <sup>c</sup> |             |       |         |
| MO #                 | $IE_v$ / eV | Sym    | State                      | $IE_v$ / eV | Sym   | Assign. | State                   | $IE_v$ / eV | Sym   | Assign. |
| 38                   | 9.83        |        | $D_0$                      | 9.83        | $A_1$ |         | $D_0$                   | 9.30        | $A_1$ |         |
| 37                   | 9.83        | $7t_2$ | $D_1$                      | 9.89        | $E$   | $7t_2$  | $D_1$                   | 10.46       | $E$   | $7t_2$  |
| 36                   | 9.83        |        |                            | 9.89        | $E$   |         |                         | 10.46       | $E$   |         |
| 35                   | 11.18       |        | $D_2$                      | 11.07       | $A_2$ | $3e$    | $D_2$                   | 11.22       | $E$   | $3e$    |
| 34                   | 11.18       | $2t_1$ | $D_3$                      | 11.12       | $A_2$ | $2t_1$  |                         | 11.22       | $E$   |         |
| 33                   | 11.18       |        | $D_4$                      | 11.14       | $A_1$ | $3e$    | $D_3$                   | 11.79       | $E$   |         |
| 32                   | 11.25       | $3e$   | $D_5$                      | 11.15       | $E$   | $2t_1$  |                         | 11.79       | $E$   | $2t_1$  |
| 31                   | 11.25       |        |                            | 11.15       | $E$   | $2t_1$  | $D_4$                   | 11.90       | $A_2$ |         |
| 30                   | 13.15       |        | $D_6$                      | 13.06       | $E$   |         | $D_5$                   | 13.25       | $A_1$ |         |
| 29                   | 13.15       | $6t_2$ |                            | 13.06       | $E$   | $6t_2$  | $D_6$                   | 13.50       | $E$   | $6t_2$  |
| 28                   | 13.15       |        | $D_7$                      | 13.13       | $A_1$ |         |                         | 13.50       | $E$   |         |
| 27                   | 13.60       |        | $D_8$                      | 13.56       | $E$   |         | $D_7$                   | 13.98       | $E$   |         |
| 26                   | 13.60       | $1t_1$ |                            | 13.56       | $E$   | $1t_1$  |                         | 13.98       | $E$   | $1t_1$  |
| 25                   | 13.60       |        | $D_9$                      | 13.58       | $A_2$ |         | $D_8$                   | 14.06       | $A_2$ |         |
| 24                   | 14.92       |        | $D_{10}$                   | 14.93       | $E$   |         | $D_9$                   | 15.34       | $E$   |         |
| 23                   | 14.92       | $5t_2$ |                            | 14.93       | $E$   | $5t_2$  |                         | 15.34       | $E$   | $5t_2$  |
| 22                   | 14.92       |        | $D_{11}$                   | 14.94       | $A_1$ |         | $D_{10}$                | 15.47       | $A_1$ |         |
| 21                   | 15.17       | $5a_1$ | $D_{12}$                   | 15.28       | $A_1$ | $5a_1$  | $D_{11}$                | 15.59       | $A_1$ | $5a_1$  |

<sup>a</sup> Energies are the negative MO eigenenergies ( $-\epsilon$ ) shifted by +0.85 eV ( $IE_v + \epsilon_{\text{HOMO}}$ ).

<sup>b</sup> Energies are shifted to match  $D_0$  to the calculated first  $IE_v$  (9.83 eV).

<sup>c</sup> Energies are shifted to match  $D_0$  to the experimental first  $IE_a$  (9.30 eV).

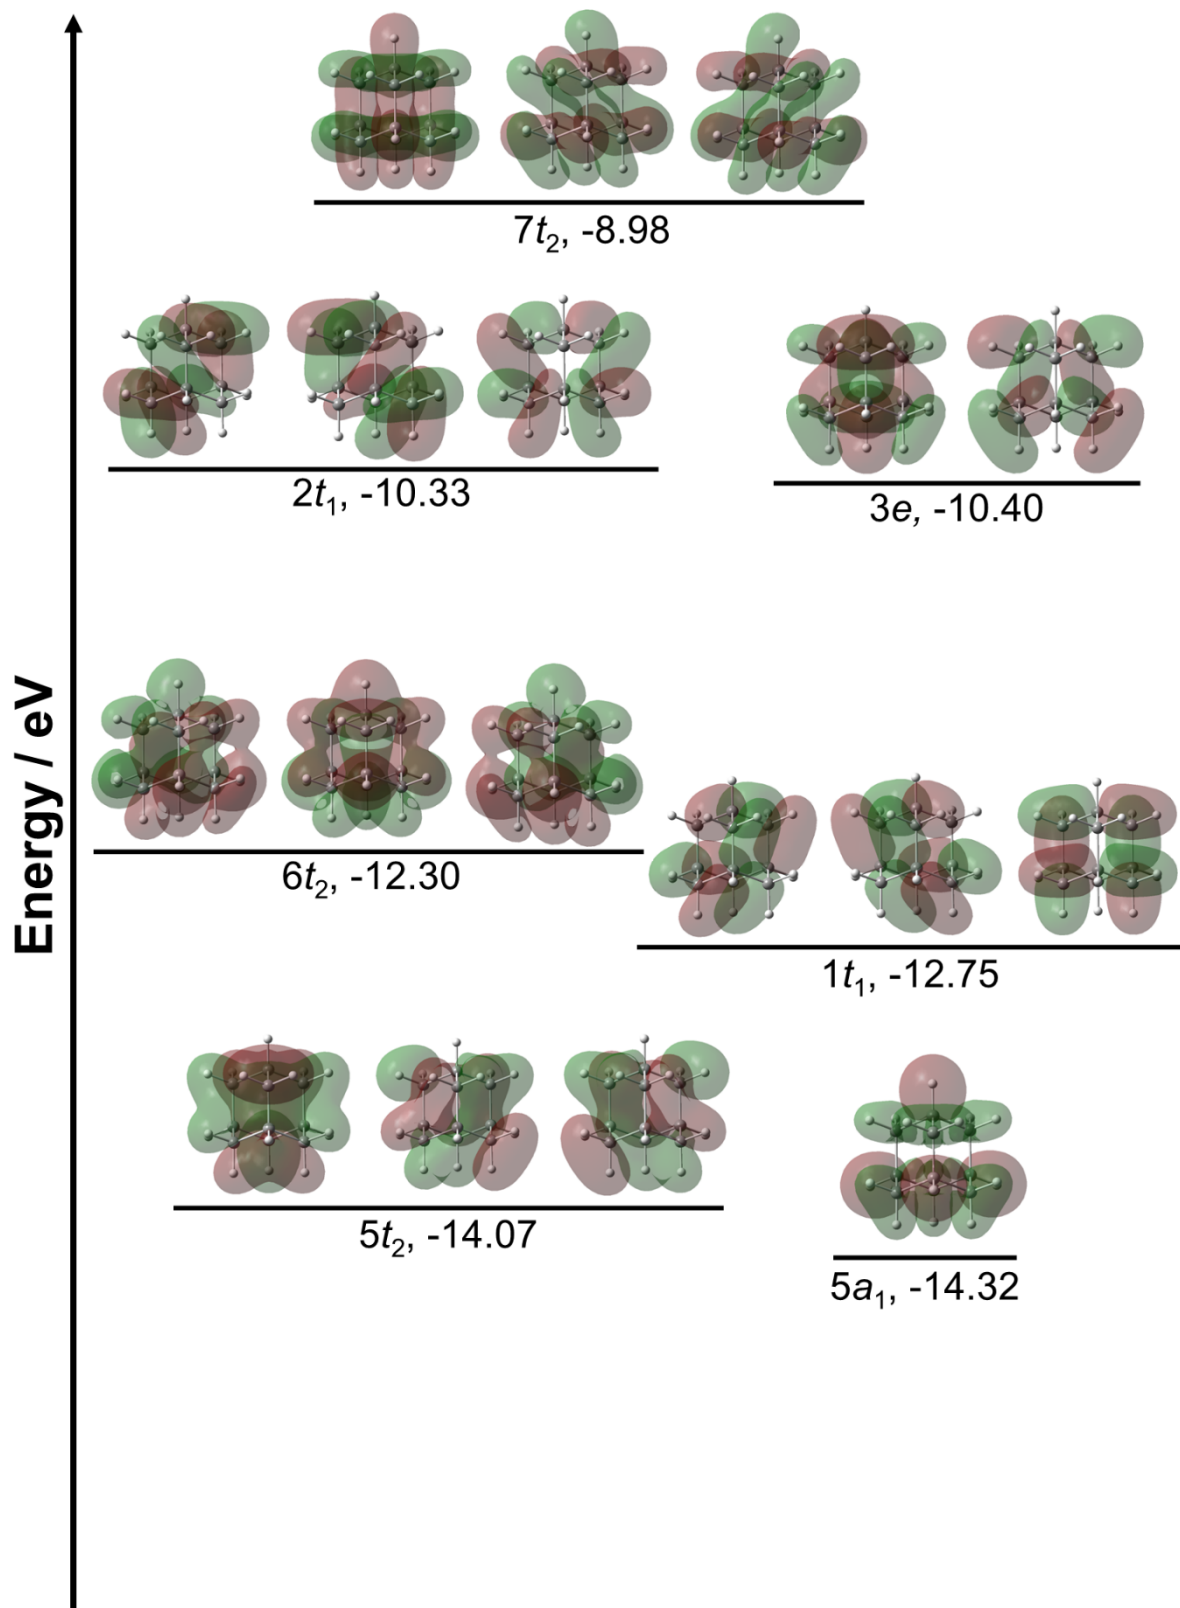

**Figure S2.** Canonical MOs of Ada at the M06-2X(D3)/cc-pVTZ level with symmetry labels and eigenenergies ( $\epsilon$ ), given in units of eV.

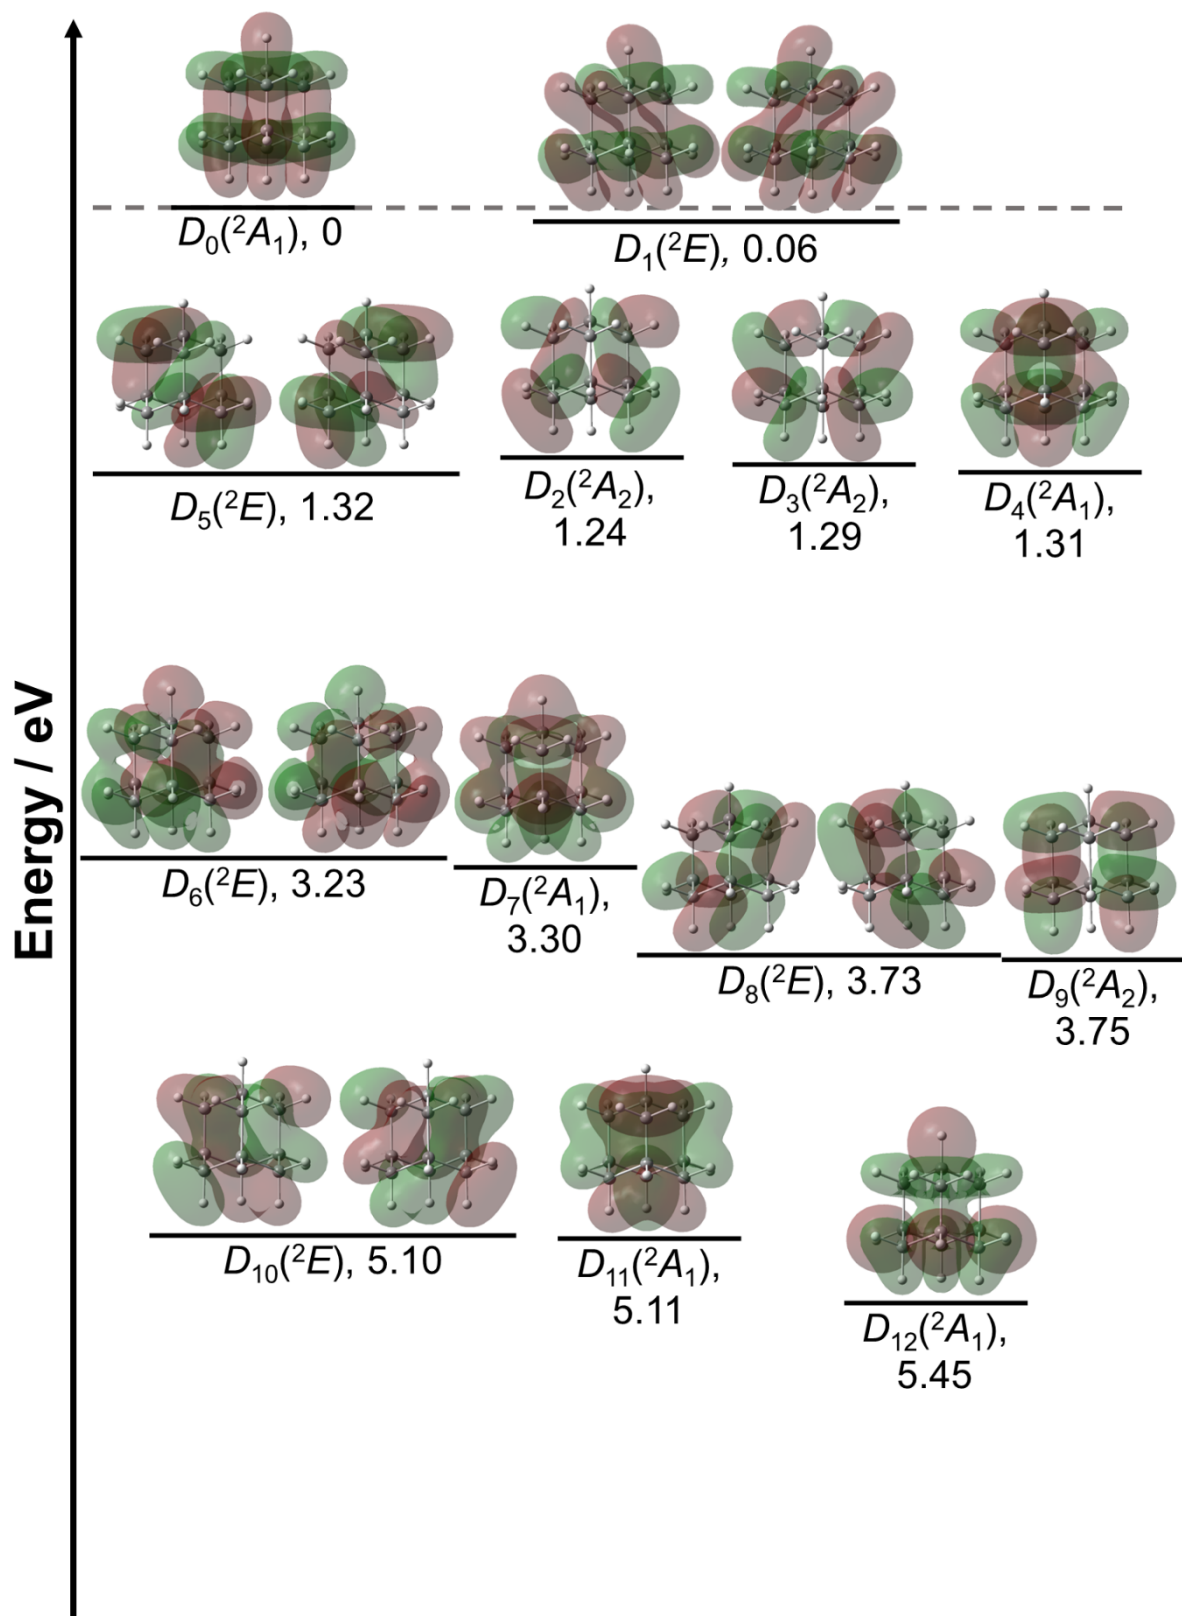

**Figure S3.** NTOs of  $\text{Ada}^+$  at the M06-2X(D3)/cc-pVTZ level in the optimized neutral geometry for the first 12 excited electronic states. All transitions are in the form of  $\text{SOMO} \leftarrow \text{SOMO} - n$ , where  $n$  is the number of the excited state. Energies are given in units of eV.

**Table S2.** Intense FC Excitations of the Ada  $D_0(^2A_1) \leftarrow S_0(^1A_1)$  Transition.

| Transition Energy<br>/ $\text{cm}^{-1}$ <sup>a</sup> | Mode                           | Intensity $\cdot 10^{-5}$<br>/ $\text{dm}^3 \text{mol}^{-1} \text{cm}^{-1}$ |
|------------------------------------------------------|--------------------------------|-----------------------------------------------------------------------------|
| 0                                                    | 0-0                            | 6.73                                                                        |
| 464                                                  | $\nu_{16}$                     | 1.91                                                                        |
| 751                                                  | $\nu_{14}$                     | 1.73                                                                        |
| 886                                                  | $\nu_{12}$                     | 5.56                                                                        |
| 1080                                                 | $\nu_{10}$                     | 1.82                                                                        |
| 1270                                                 | $\nu_9$                        | 10.01                                                                       |
| 1350                                                 | $\nu_{12} + \nu_{16}$          | 1.55                                                                        |
| 1636                                                 | $\nu_{12} + \nu_{14}$          | 1.25                                                                        |
| 1734                                                 | $\nu_9 + \nu_{16}$             | 2.86                                                                        |
| 1772                                                 | $2\nu_{12}$                    | 2.06                                                                        |
| 1966                                                 | $\nu_{10} + \nu_{12}$          | 1.48                                                                        |
| 2020                                                 | $\nu_9 + \nu_{14}$             | 2.42                                                                        |
| 2156                                                 | $\nu_9 + \nu_{12}$             | 8.04                                                                        |
| 2349                                                 | $\nu_9 + \nu_{10}$             | 2.66                                                                        |
| 2540                                                 | $2\nu_9$                       | 7.21                                                                        |
| 2620                                                 | $\nu_9 + \nu_{12} + \nu_{16}$  | 2.26                                                                        |
| 2906                                                 | $\nu_9 + \nu_{12} + \nu_{14}$  | 1.70                                                                        |
| 3004                                                 | $\nu_9 + \nu_{16}$             | 2.07                                                                        |
| 3042                                                 | $\nu_9 + 2\nu_{12}$            | 2.88                                                                        |
| 3235                                                 | $\nu_9 + \nu_{10} + \nu_{12}$  | 2.09                                                                        |
| 3290                                                 | $2\nu_9 + \nu_{14}$            | 1.64                                                                        |
| 3426                                                 | $2\nu_9 + \nu_{12}$            | 5.62                                                                        |
| 3619                                                 | $2\nu_9 + \nu_{10}$            | 1.87                                                                        |
| 3809                                                 | $3\nu_9$                       | 3.35                                                                        |
| 3890                                                 | $2\nu_9 + \nu_{12} + \nu_{16}$ | 1.59                                                                        |
| 4311                                                 | $2\nu_9 + 2\nu_{12}$           | 1.95                                                                        |
| 4505                                                 | $2\nu_9 + \nu_{10} + \nu_{12}$ | 1.43                                                                        |
| 4695                                                 | $3\nu_9 + \nu_{12}$            | 2.53                                                                        |

<sup>a</sup> Energies are expressed in relation to the 0-0 band located at  $71096 \text{ cm}^{-1}$ .

## CYANOADAMANTANE

**Table S3.** Assignment of the AdCN PES spectrum using MO eigenvalues of neutral AdCN vs. vertical transition energies of AdCN<sup>+</sup> computed at the M06-2X(D3)/cc-pVTZ level.

| AdCN MOs <sup>a</sup> |             |                  | AdCN <sup>+</sup> TD-DFT   |             |     |                  |                         |     |
|-----------------------|-------------|------------------|----------------------------|-------------|-----|------------------|-------------------------|-----|
| $C_{3v}$              |             |                  | Neutral geom. <sup>b</sup> |             |     |                  | Opt. geom. <sup>c</sup> |     |
| MO #                  | $IE_v$ / eV | Sym              | State                      | $IE_v$ / eV | Sym | Assign.          | $IE_v$ / eV             | Sym |
|                       |             |                  | $C_{3v} \rightarrow C_s$   |             |     |                  | $C_s \rightarrow C_1$   |     |
| 44                    | 10.34       | 13e              | $D_0$                      | 10.34       | A'  | 13e              | 9.78                    | A   |
| 43                    | 10.34       |                  | $D_1$                      | 10.37       | A'' |                  | 11.00                   | A   |
| 42                    | 10.76       | 15a <sub>1</sub> | $D_2$                      | 10.62       | A'  | 15a <sub>1</sub> | 11.49                   | A   |
| 41                    | 11.23       | 12e              | $D_3$                      | 11.21       | A'' | 12e              | 11.57                   | A   |
| 40                    | 11.23       |                  | $D_4$                      | 11.28       | A'  |                  | 11.88                   | A   |
| 39                    | 11.76       | 2a <sub>2</sub>  | $D_5$                      | 11.67       | A'' | 11e              | 11.93                   | A   |
| 38                    | 11.84       | 11e              | $D_6$                      | 11.70       | A'  |                  | 12.36                   | A   |
| 37                    | 11.84       |                  | $D_7$                      | 11.73       | A'' | 2a <sub>2</sub>  | 12.46                   | A   |
| 36                    | 12.36       | 10e              | $D_8$                      | 12.38       | A'' | 10e              | 12.92                   | A   |
| 35                    | 12.36       |                  | $D_9$                      | 12.46       | A'  |                  | 13.04                   | A   |
| 34                    | 12.68       | 14a <sub>1</sub> | $D_{10}$                   | 12.80       | A'  | 14a <sub>1</sub> | 13.39                   | A   |
| 33                    | 13.70       | 9e               | $D_{11}$                   | 13.62       | A'' | 9e               | 13.85                   | A   |
| 32                    | 13.70       |                  | $D_{12}$                   | 13.66       | A'  |                  | 14.04                   | A   |
| 31                    | 14.18       | 1a <sub>2</sub>  | $D_{13}$                   | 14.14       | A'' | 1a <sub>2</sub>  | 14.64                   | A   |
| 30                    | 14.41       | 13a <sub>1</sub> | $D_{14}$                   | 14.36       | A'  | 13a <sub>1</sub> | 14.80                   | A   |
| 29                    | 14.50       | 8e               | $D_{15}$                   | 14.43       | A'' | 8e               | 14.97                   | A   |
| 28                    | 14.50       |                  | $D_{16}$                   | 14.44       | A'  |                  | 15.03                   | A   |
| 27                    | 15.46       | 12a <sub>1</sub> | $D_{17}$                   | 15.45       | A'  | 12a <sub>1</sub> | 15.89                   | A   |
| 26                    | 15.54       | 7e               | $D_{18}$                   | 15.52       | A'' | 7e               | 16.05                   | A   |
| 25                    | 15.54       |                  | $D_{19}$                   | 15.52       | A'  |                  | 16.12                   | A   |
| 24                    | 16.51       | 11a <sub>1</sub> | $D_{20}$                   | 16.52       | A'  | 11a <sub>1</sub> | 17.01                   | A   |

<sup>a</sup> Energies are the negative MO eigenenergies ( $-\epsilon$ ) shifted by +0.82 eV ( $IE_v + \epsilon_{\text{HOMO}}$ ).

<sup>b</sup> Energies are shifted to match  $D_0$  to the calculated first  $IE_v$  (10.34 eV).

<sup>c</sup> Energies are shifted to match  $D_0$  to the experimental first  $IE_a$  (9.78 eV).

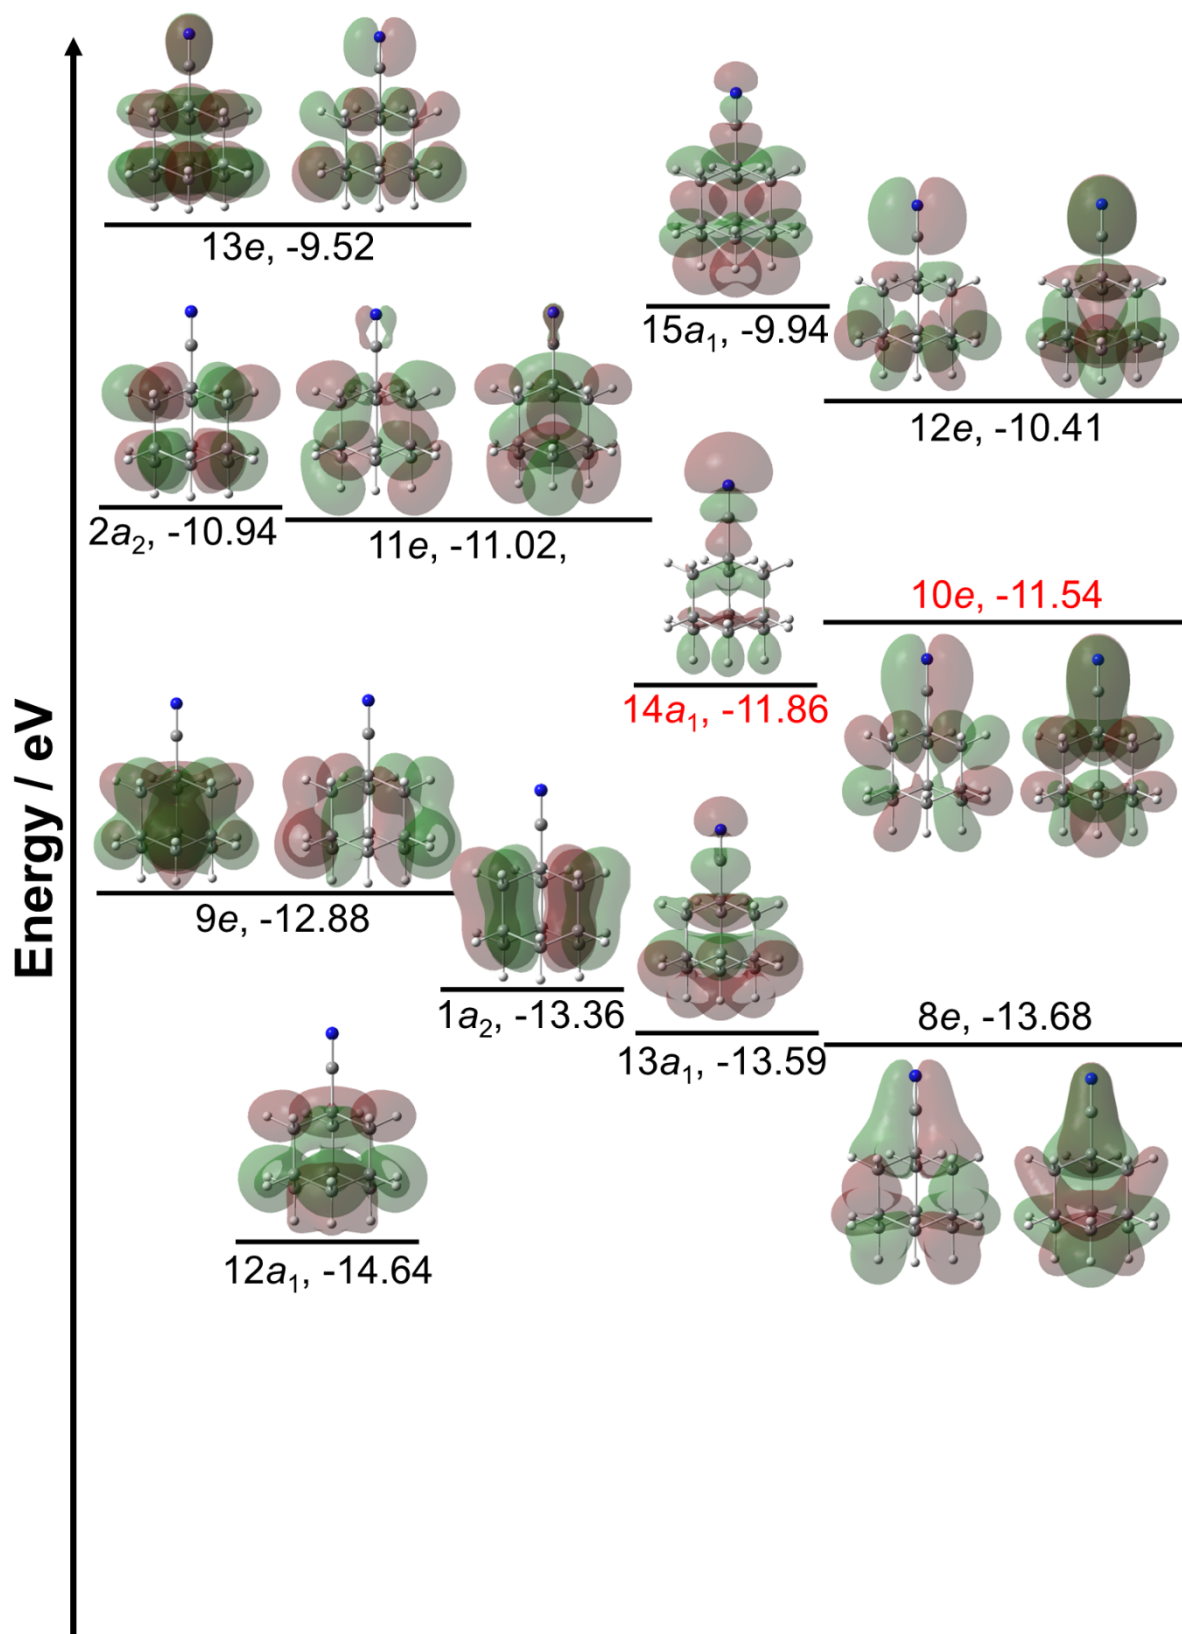

**Figure S4.** Canonical MOs of AdCN at the M06-2X(D3)/cc-pVTZ level with symmetry labels and eigenenergies ( $\epsilon$ ), given in units of eV. Orbitals in red are primarily attributed to the nitrile group.

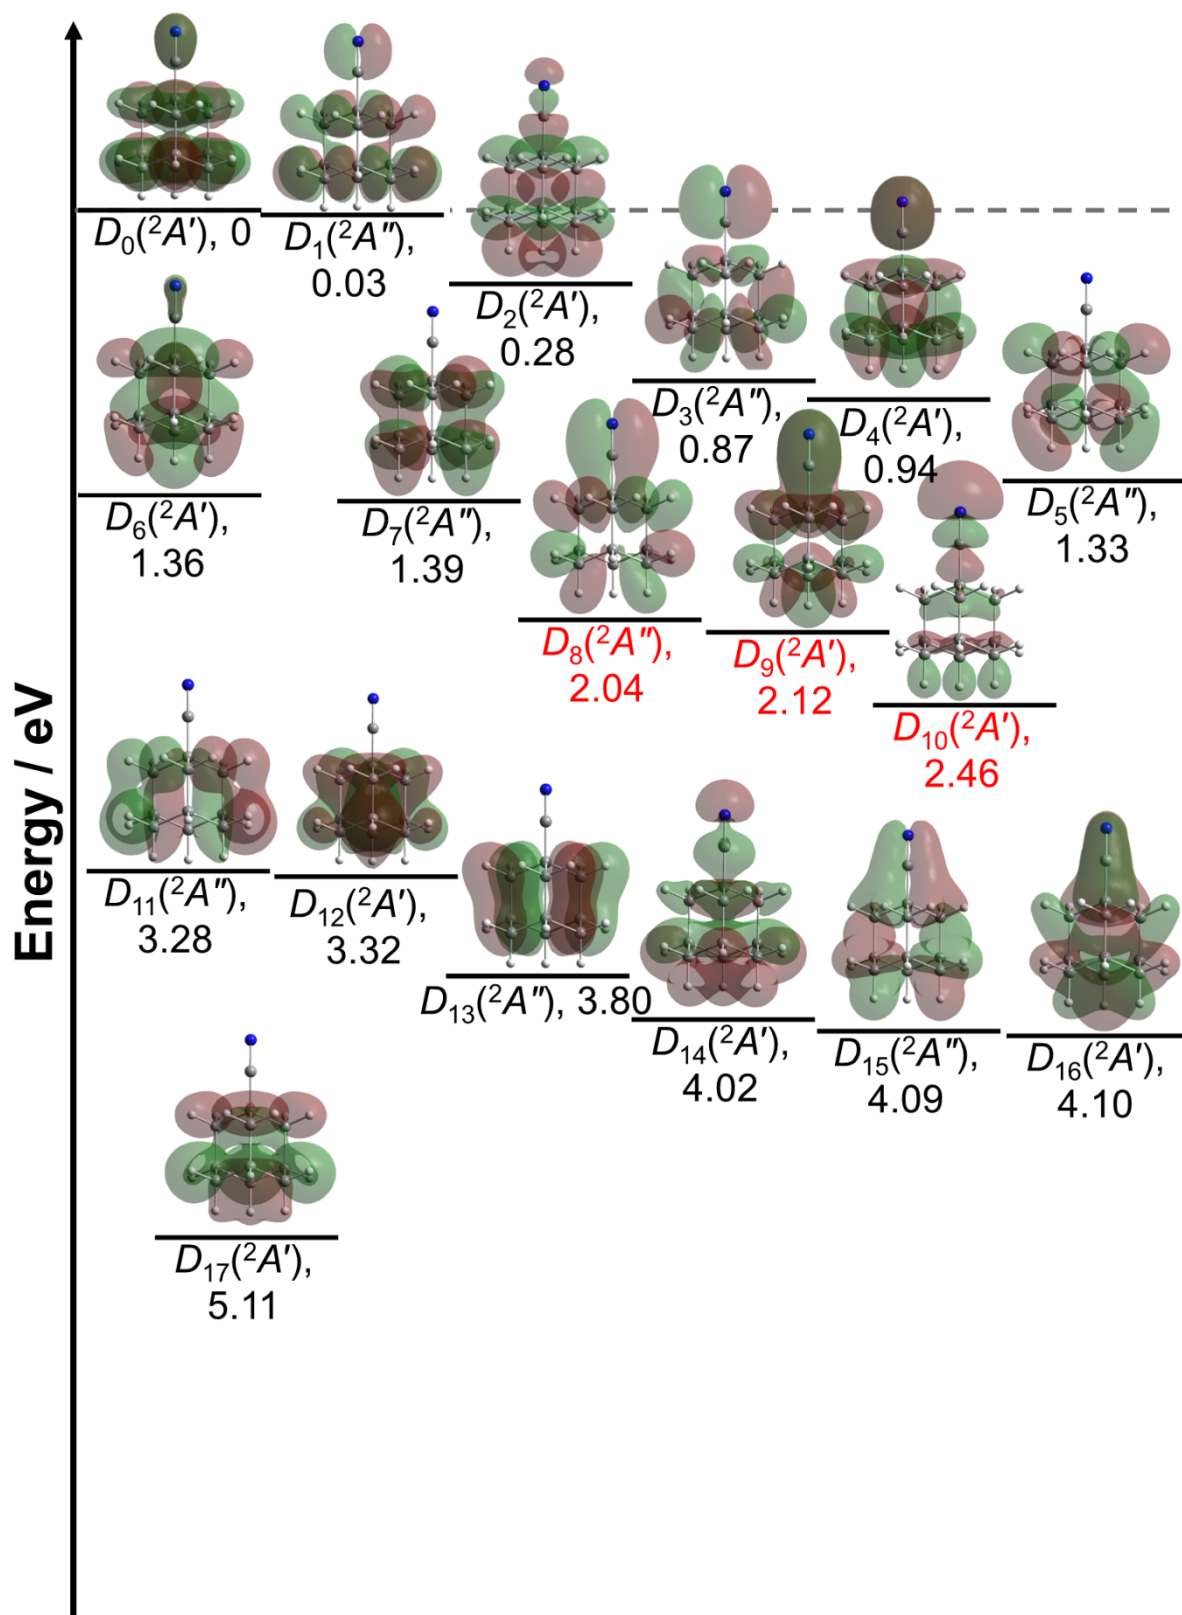

**Figure S5.** NTOs of  $\text{AdCN}^+$  at the M06-2X(D3)/cc-pVTZ level in the optimized neutral geometry for the first 17 excited electronic states. All transitions are in the form of  $\text{SOMO} \leftarrow \text{SOMO} - n$ , where  $n$  is the number of the excited state. Energies are given in units of eV. NTOs labeled in red indicate transitions originating from orbitals primarily attributed to the nitrile group.



**Table S4.** Intense FC Excitations of the AdCN  $D_0(^2A) \leftarrow S_0(^1A_1)$  Transition.

| Transition Energy<br>/ $\text{cm}^{-1}$ <sup>a</sup> | Mode                  | Intensity $\cdot 10^{-4}$<br>/ $\text{dm}^3 \text{mol}^{-1} \text{cm}^{-1}$ |
|------------------------------------------------------|-----------------------|-----------------------------------------------------------------------------|
| 0                                                    | 0-0                   | 3.74                                                                        |
| 361                                                  | $\nu_{69}$            | 0.34                                                                        |
| 447                                                  | $\nu_{66}$            | 0.60                                                                        |
| 764                                                  | $\nu_{56}$            | 0.54                                                                        |
| 795                                                  | $\nu_{55}$            | 0.31                                                                        |
| 844                                                  | $\nu_{53}$            | 0.38                                                                        |
| 848                                                  | $\nu_{52}$            | 1.07                                                                        |
| 890                                                  | $\nu_{50}$            | 1.28                                                                        |
| 903                                                  | $\nu_{49}$            | 0.59                                                                        |
| 1077                                                 | $\nu_{40}$            | 0.31                                                                        |
| 1127                                                 | $\nu_{37}$            | 0.64                                                                        |
| 1221                                                 | $\nu_{33}$            | 3.26                                                                        |
| 1286                                                 | $\nu_{30}$            | 0.35                                                                        |
| 1303                                                 | $\nu_{29}$            | 0.32                                                                        |
| 1667                                                 | $\nu_{33} + \nu_{66}$ | 0.52                                                                        |
| 1734                                                 | $\nu_{33} + \nu_{53}$ | 0.40                                                                        |
| 1985                                                 | $\nu_{33} + \nu_{56}$ | 0.46                                                                        |
| 2064                                                 | $\nu_{33} + \nu_{53}$ | 0.94                                                                        |
| 2068                                                 | $\nu_{33} + \nu_{52}$ | 1.22                                                                        |
| 2111                                                 | $\nu_{33} + \nu_{50}$ | 1.31                                                                        |
| 2123                                                 | $\nu_{33} + \nu_{49}$ | 0.49                                                                        |
| 2348                                                 | $\nu_{20} + \nu_{37}$ | 0.56                                                                        |
| 2441                                                 | $2\nu_{33}$           | 1.35                                                                        |
| 2507                                                 | $\nu_{33} + \nu_{30}$ | 0.30                                                                        |
| 3662                                                 | $3\nu_{33}$           | 0.35                                                                        |

<sup>a</sup> Energies are expressed in relation to the 0-0 band located at  $75105 \text{ cm}^{-1}$

## AMANTADINE

**Table S5.** Assignment of the AdNH<sub>2</sub> PES spectrum using MO eigenvalues of neutral AdNH<sub>2</sub> vs. vertical transition energies of AdNH<sub>2</sub><sup>+</sup> computed at the M06-2X(D3)/cc-pVTZ level.

| AdNH <sub>2</sub> MOs <sup>a</sup> |                      |       | AdNH <sub>2</sub> <sup>+</sup> TD-DFT |                      |     |         |                         |     |         |
|------------------------------------|----------------------|-------|---------------------------------------|----------------------|-----|---------|-------------------------|-----|---------|
| C <sub>s</sub>                     |                      |       | Neutral geom. <sup>b</sup>            |                      |     |         | Opt. geom. <sup>c</sup> |     |         |
| MO #                               | IE <sub>v</sub> / eV | Sym   | State                                 | IE <sub>v</sub> / eV | Sym | Assign. | IE <sub>v</sub> / eV    | Sym | Assign. |
| 42                                 | 8.88                 | 27a'  | D <sub>0</sub>                        | 8.88                 | A'  | 27a'    | 8.27                    | A'  | 27a'    |
| 41                                 | 9.84                 | 15a'' | D <sub>1</sub>                        | 9.69                 | A'' | 15a''   | 10.63                   | A'' | 15a''   |
| 40                                 | 10.02                | 26a'  | D <sub>2</sub>                        | 9.91                 | A'  | 26a'    | 10.78                   | A'  | 26a'    |
| 39                                 | 10.36                | 25a'  | D <sub>3</sub>                        | 10.22                | A'  | 25a'    | 11.02                   | A'  | 25a'    |
| 38                                 | 11.11                | 14a'' | D <sub>4</sub>                        | 10.94                | A'' | 14a''   | 11.84                   | A'  | 24a'    |
| 37                                 | 11.18                | 13a'' | D <sub>5</sub>                        | 11.09                | A'' | 13a''   | 11.89                   | A'' | 14a''   |
| 36                                 | 11.25                | 24a'  | D <sub>6</sub>                        | 11.12                | A'  | 24a'    | 11.93                   | A'' | 13a''   |
| 35                                 | 11.26                | 12a'' | D <sub>7</sub>                        | 11.14                | A'' | 12a''   | 11.99                   | A'' | 12a''   |
| 34                                 | 11.53                | 23a'  | D <sub>8</sub>                        | 11.45                | A'  | 23a'    | 12.22                   | A'  | 23a'    |
| 33                                 | 13.08                | 11a'' | D <sub>9</sub>                        | 12.97                | A'' | 11a''   | 13.72                   | A'  | 11a''   |
| 32                                 | 13.15                | 22a'  | D <sub>10</sub>                       | 13.05                | A'  | 22a'    | 13.72                   | A'' | 22a'    |
| 31                                 | 13.28                | 10a'' | D <sub>11</sub>                       | 13.13                | A'  | 21a'    | 14.02                   | A'  | 21a'    |
| 30                                 | 13.35                | 21a'  | D <sub>12</sub>                       | 13.21                | A'' | 10a''   | 14.07                   | A'' | 10a''   |
| 29                                 | 13.59                | 9a''  | D <sub>13</sub>                       | 13.50                | A'' | 9a''    | 14.35                   | A'' | 9a''    |
| 28                                 | 14.01                | 20a'  | D <sub>14</sub>                       | 13.90                | A'  | 20a'    | 14.51                   | A'  | 20a'    |
| 27                                 | 14.89                | 8a''  | D <sub>15</sub>                       | 14.82                | A'' | 8a''    | 15.53                   | A'' | 8a''    |
| 26                                 | 14.91                | 19a'  | D <sub>16</sub>                       | 14.84                | A'  | 19a'    | 15.56                   | A'  | 19a'    |
| 25                                 | 14.94                | 18a'  | D <sub>17</sub>                       | 14.85                | A'  | 18a'    | 15.71                   | A'  | 18a'    |
| 24                                 | 15.33                | 17a'  | D <sub>18</sub>                       | 15.21                | A'  | 17a'    | 15.75                   | A'  | 17a'    |
| 23                                 | 15.59                | 16a'  | D <sub>19</sub>                       | 15.45                | A'  | 16a'    | 16.29                   | A'  | 16a'    |

<sup>a</sup> Energies are the negative MO eigenenergies ( $-\epsilon$ ) shifted by +0.79 eV ( $IE_v + \epsilon_{\text{HOMO}}$ ).

<sup>b</sup> Energies are shifted to match  $D_0$  to the calculated first  $IE_v$  (8.88 eV).

<sup>c</sup> Energies are shifted to match  $D_0$  to the experimental first  $IE_a$  (8.27 eV).

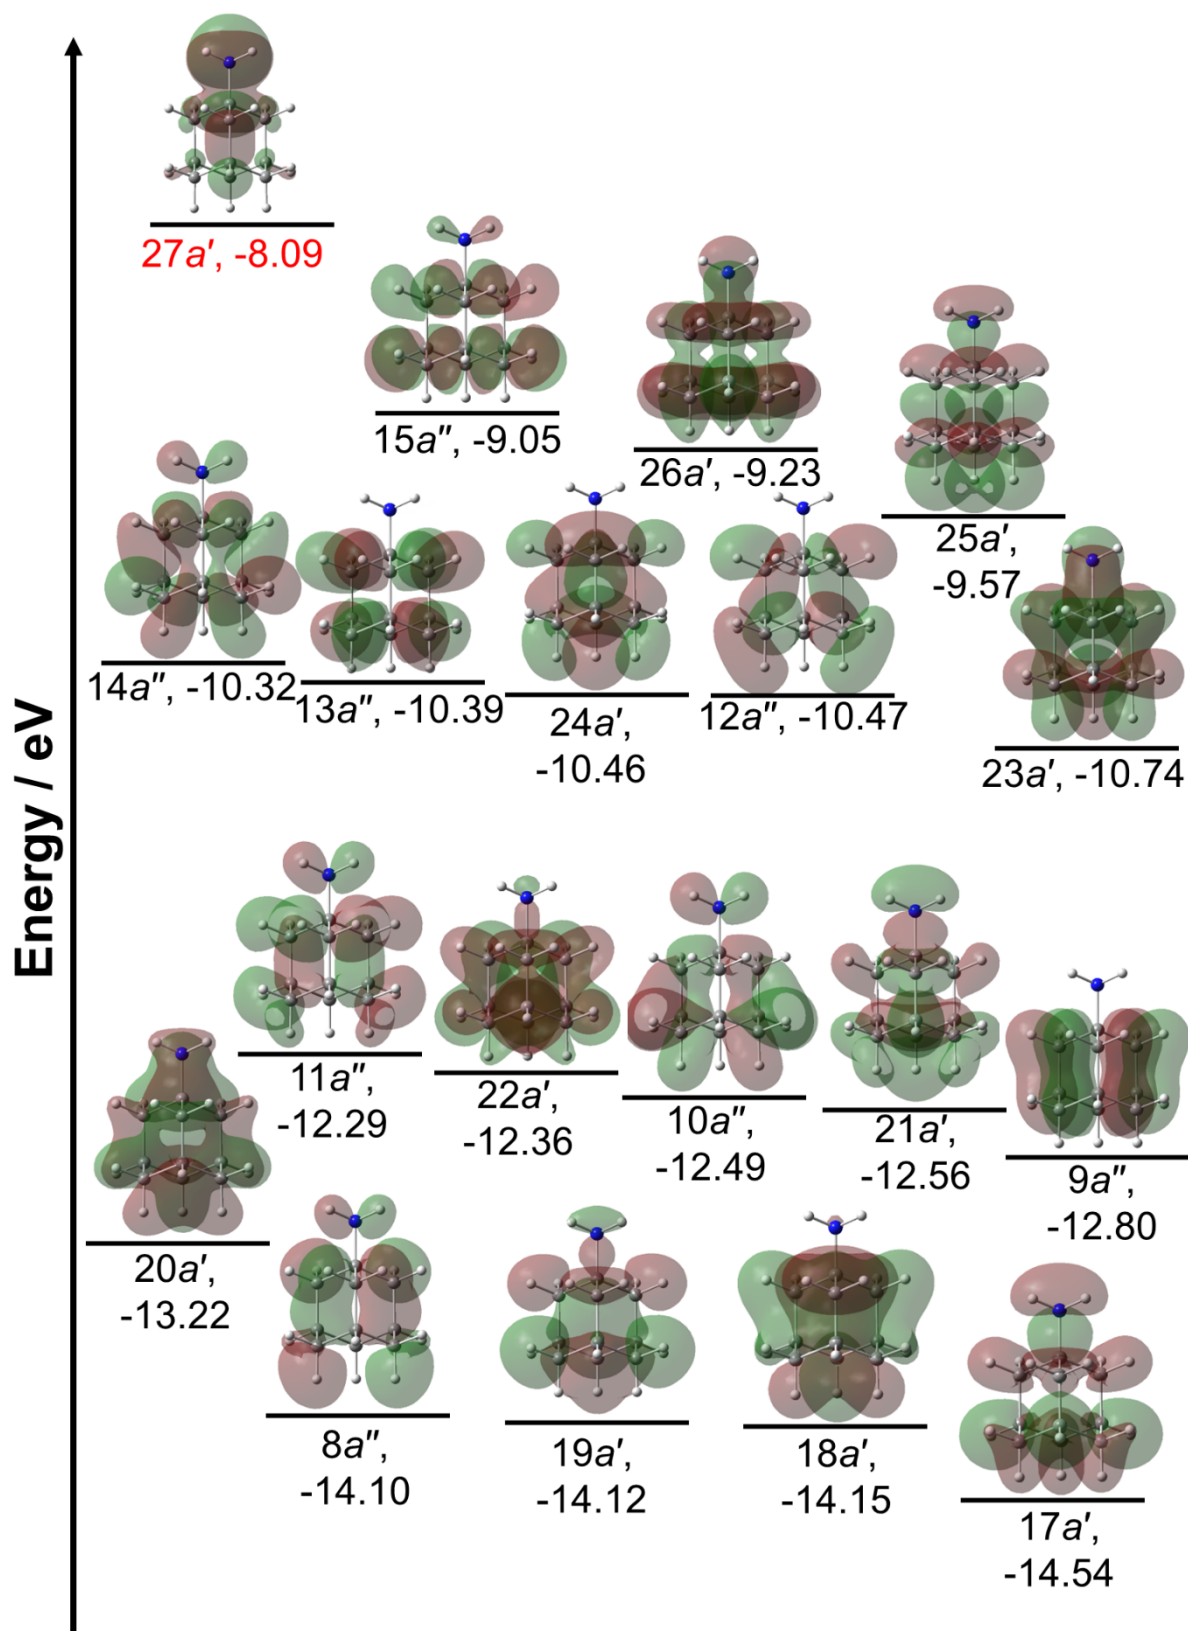

**Figure S6.** Canonical MOs of AdNH<sub>2</sub> at the M06-2X(D3)/cc-pVTZ level with symmetry labels and eigenenergies ( $\epsilon$ ), given in units of eV. The HOMO (red) is primarily attributed to the nitrogen lone pair ( $n_N$ ) of the amino group.

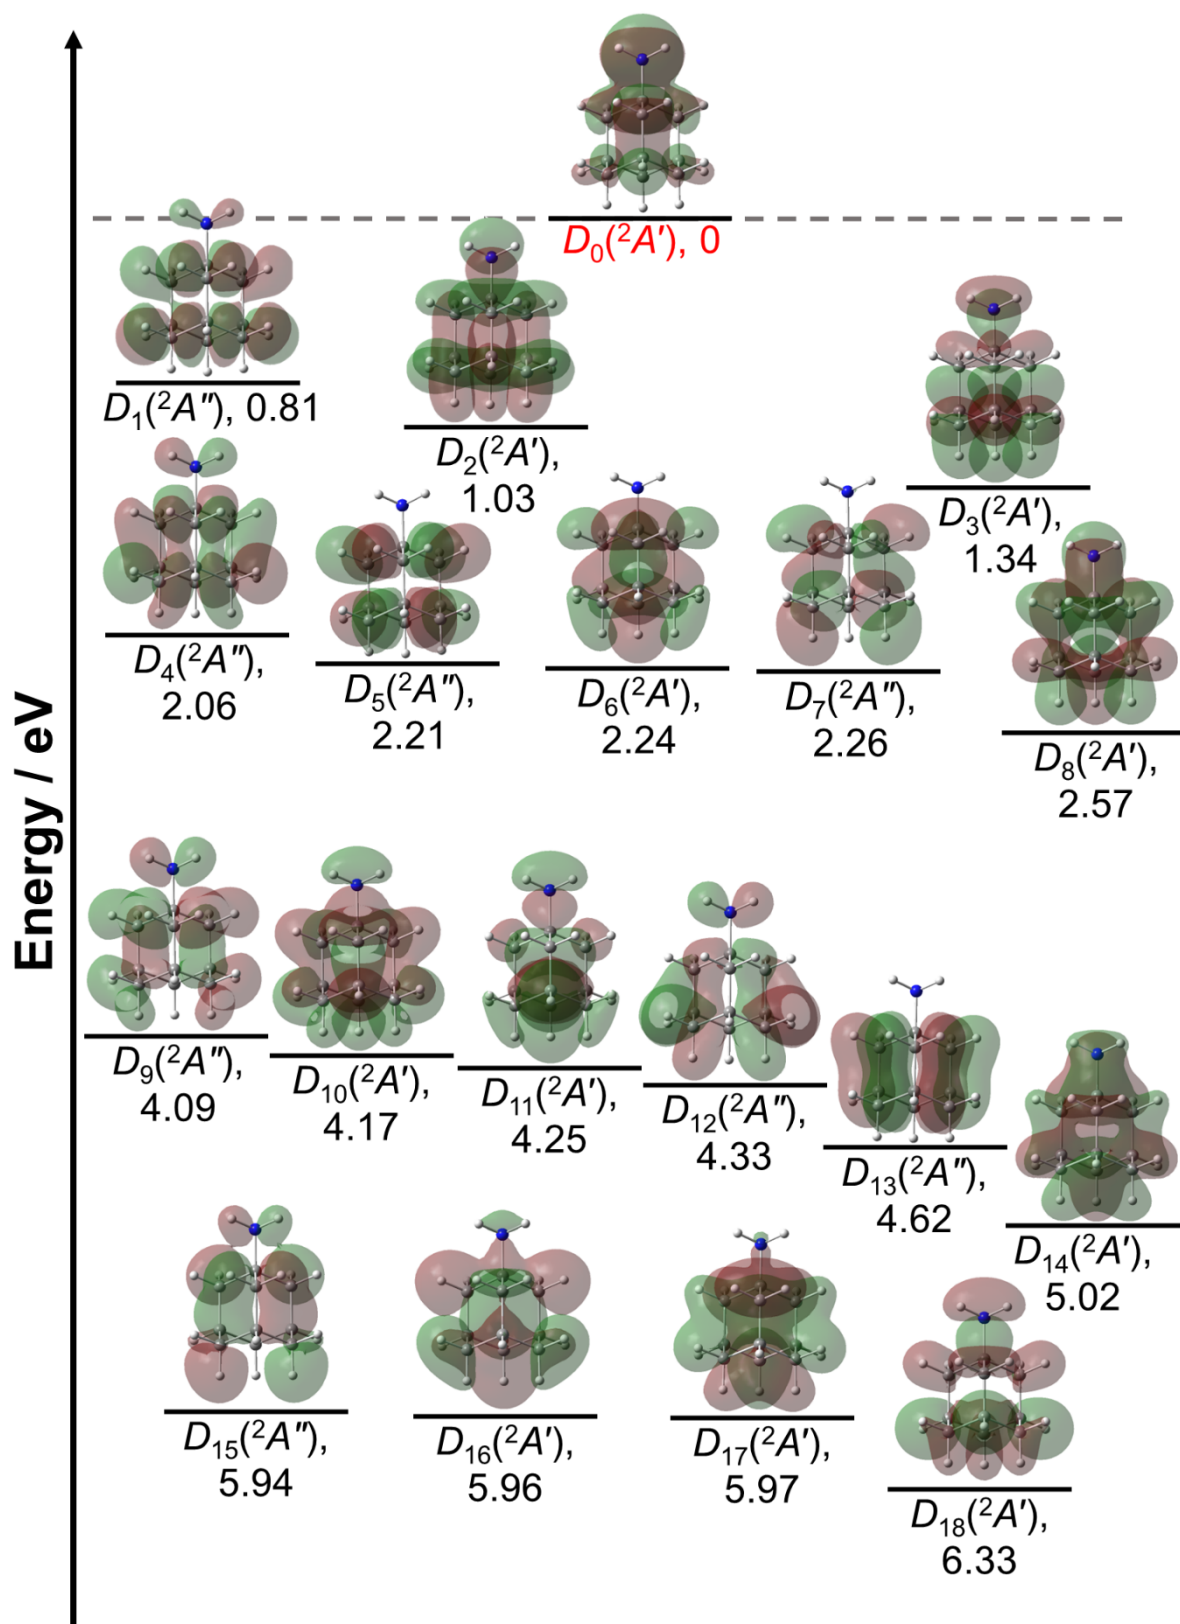

**Figure S7.** NTOs of  $\text{AdNH}_2^+$  at the M06-2X(D3)/cc-pVTZ level in the optimized neutral geometry for the first 18 excited electronic states. All transitions are in the form of  $\text{SOMO} \leftarrow \text{SOMO} - n$ , where  $n$  is the number of the excited state and the SOMO (red) is primarily attributed to the nitrogen lone pair ( $n_N$ ) of the amino group. Energies are given in units of eV.

**Table S6.** Intense FC Excitations of the AdNH<sub>2</sub> D<sub>0</sub>(<sup>2</sup>A')←S<sub>0</sub>(<sup>1</sup>A') Transition.

| Transition Energy<br>/ cm <sup>-1</sup> <sup>a</sup> | Mode                                                 | Intensity · 10 <sup>-4</sup><br>/ dm <sup>3</sup> mol <sup>-1</sup> cm <sup>-1</sup> |
|------------------------------------------------------|------------------------------------------------------|--------------------------------------------------------------------------------------|
| 0                                                    | 0-0                                                  | 0.76                                                                                 |
| 615                                                  | v <sub>36</sub>                                      | 3.54                                                                                 |
| 1229                                                 | 2v <sub>36</sub>                                     | 7.46                                                                                 |
| 1279                                                 | v <sub>35</sub> + v <sub>36</sub>                    | 3.81                                                                                 |
| 1731                                                 | 2v <sub>36</sub> + v <sub>37</sub>                   | 3.04                                                                                 |
| 1844                                                 | 3v <sub>36</sub>                                     | 9.32                                                                                 |
| 1894                                                 | v <sub>35</sub> + 2v <sub>36</sub>                   | 7.49                                                                                 |
| 1993                                                 | v <sub>34</sub> + 2v <sub>36</sub>                   | 3.02                                                                                 |
| 2346                                                 | 3v <sub>36</sub> + v <sub>37</sub>                   | 4.13                                                                                 |
| 2396                                                 | v <sub>35</sub> + 2v <sub>36</sub> + v <sub>37</sub> | 2.79                                                                                 |
| 2458                                                 | 4v <sub>36</sub>                                     | 7.58                                                                                 |
| 2508                                                 | v <sub>35</sub> + 3v <sub>36</sub>                   | 8.63                                                                                 |
| 2558                                                 | 2v <sub>35</sub> + 2v <sub>36</sub>                  | 3.49                                                                                 |
| 2608                                                 | v <sub>34</sub> + 3v <sub>36</sub>                   | 3.48                                                                                 |
| 2658                                                 | v <sub>34</sub> + v <sub>35</sub> + 2v <sub>36</sub> | 2.73                                                                                 |
| 2960                                                 | 4v <sub>36</sub> + v <sub>37</sub>                   | 3.70                                                                                 |
| 3010                                                 | v <sub>35</sub> + 3v <sub>36</sub> + v <sub>37</sub> | 3.52                                                                                 |
| 3073                                                 | 5v <sub>36</sub>                                     | 4.13                                                                                 |
| 3123                                                 | v <sub>35</sub> + 4v <sub>36</sub>                   | 6.36                                                                                 |
| 3173                                                 | 2v <sub>35</sub> + 3v <sub>36</sub>                  | 3.67                                                                                 |
| 3222                                                 | v <sub>34</sub> + 4v <sub>36</sub>                   | 2.57                                                                                 |
| 3272                                                 | v <sub>34</sub> + v <sub>35</sub> + 3v <sub>36</sub> | 2.87                                                                                 |
| 3625                                                 | v <sub>35</sub> + 4v <sub>36</sub> + v <sub>37</sub> | 2.87                                                                                 |
| 3737                                                 | v <sub>35</sub> + 5v <sub>36</sub>                   | 3.05                                                                                 |
| 4735                                                 | v <sub>1</sub> + 2v <sub>36</sub>                    | 2.39                                                                                 |
| 5350                                                 | v <sub>1</sub> + 3v <sub>36</sub>                    | 4.09                                                                                 |
| 5400                                                 | v <sub>1</sub> + v <sub>35</sub> + 2v <sub>36</sub>  | 2.85                                                                                 |
| 5964                                                 | v <sub>1</sub> + 4v <sub>36</sub>                    | 4.55                                                                                 |
| 6014                                                 | v <sub>1</sub> + v <sub>35</sub> + 3v <sub>36</sub>  | 4.47                                                                                 |
| 6579                                                 | v <sub>1</sub> + 5v <sub>36</sub>                    | 3.43                                                                                 |
| 6629                                                 | v <sub>1</sub> + v <sub>35</sub> + 4v <sub>36</sub>  | 4.52                                                                                 |
| 7243                                                 | v <sub>1</sub> + v <sub>35</sub> + 5v <sub>36</sub>  | 3.03                                                                                 |

<sup>a</sup> Energies are expressed in relation to the 0-0 band located at 65721cm<sup>-1</sup>.

## 1-ADAMANTANOL

**Table S7.** Assignment of the 1-AdOH PES spectrum using MO eigenvalues of neutral 1-AdOH vs. vertical transition energies of 1-AdOH<sup>+</sup> computed at the M06-2X(D3)/cc-pVTZ level.

| 1-AdOH MOs <sup>a</sup> |                      |       | 1-AdOH <sup>+</sup> TD-DFT |                      |     |                         |                      |     |
|-------------------------|----------------------|-------|----------------------------|----------------------|-----|-------------------------|----------------------|-----|
| C <sub>s</sub>          |                      |       | Neutral geom. <sup>b</sup> |                      |     | Opt. geom. <sup>c</sup> |                      |     |
| MO #                    | IE <sub>v</sub> / eV | Sym   | State                      | IE <sub>v</sub> / eV | Sym | Assign.                 | IE <sub>v</sub> / eV | Sym |
| 42                      | 9.54                 | 15a'' | D <sub>0</sub>             | 9.54                 | A'' | 15a''                   | 9.07                 | A   |
| 41                      | 9.89                 | 27a'  | D <sub>1</sub>             | 9.89                 | A'' | 27a'                    | 11.21                | A   |
| 40                      | 10.49                | 14a'' | D <sub>2</sub>             | 10.50                | A'' | 26a'                    | 11.63                | A   |
| 39                      | 10.54                | 26a'  | D <sub>3</sub>             | 10.52                | A'  | 14a''                   | 11.88                | A   |
| 38                      | 11.05                | 25a'  | D <sub>4</sub>             | 11.05                | A'' | 25a'                    | 12.31                | A   |
| 37                      | 11.26                | 13a'' | D <sub>5</sub>             | 11.35                | A'  | 13a''                   | 12.50                | A   |
| 36                      | 11.35                | 24a'  | D <sub>6</sub>             | 11.36                | A'' | 24a'                    | 12.53                | A   |
| 35                      | 11.35                | 12a'' | D <sub>7</sub>             | 11.37                | A'  | 12a''                   | 12.58                | A   |
| 34                      | 12.02                | 11a'' | D <sub>8</sub>             | 12.11                | A'  | 11a''                   | 13.34                | A   |
| 33                      | 12.73                | 23a'  | D <sub>9</sub>             | 12.68                | A'' | 23a'                    | 13.89                | A   |
| 32                      | 13.25                | 10a'' | D <sub>10</sub>            | 13.34                | A'  | 10a''                   | 14.24                | A   |
| 31                      | 13.27                | 22a'  | D <sub>11</sub>            | 13.34                | A'' | 22a'                    | 14.53                | A   |
| 30                      | 13.67                | 9a''  | D <sub>12</sub>            | 13.72                | A'' | 21a'                    | 14.86                | A   |
| 29                      | 13.72                | 21a'  | D <sub>13</sub>            | 13.75                | A'  | 9a''                    | 14.93                | A   |
| 28                      | 14.24                | 8a''  | D <sub>14</sub>            | 14.30                | A'  | 8a''                    | 15.32                | A   |
| 27                      | 14.71                | 20a'  | D <sub>15</sub>            | 14.77                | A'' | 20a'                    | 16.03                | A   |
| 26                      | 15.01                | 19a'  | D <sub>16</sub>            | 15.11                | A'' | 19a'                    | 16.06                | A   |
| 25                      | 15.05                | 7a''  | D <sub>17</sub>            | 15.14                | A'  | 7a''                    | 16.11                | A   |
| 24                      | 15.08                | 18a'  | D <sub>18</sub>            | 15.16                | A'' | 18a'                    | 16.27                | A   |
| 23                      | 16.23                | 17a'  | D <sub>19</sub>            | 16.24                | A'' | 17a'                    | 16.43                | A   |

<sup>a</sup> Energies are the negative MO eigenenergies ( $-\varepsilon$ ) shifted by +0.79 eV ( $IE_v + \varepsilon_{\text{HOMO}}$ ).

<sup>b</sup> Energies are shifted to match  $D_0$  to the calculated first  $IE_v$  (9.54 eV).

<sup>c</sup> Energies are shifted to match  $D_0$  to the experimental first  $IE_a$  (9.07 eV).

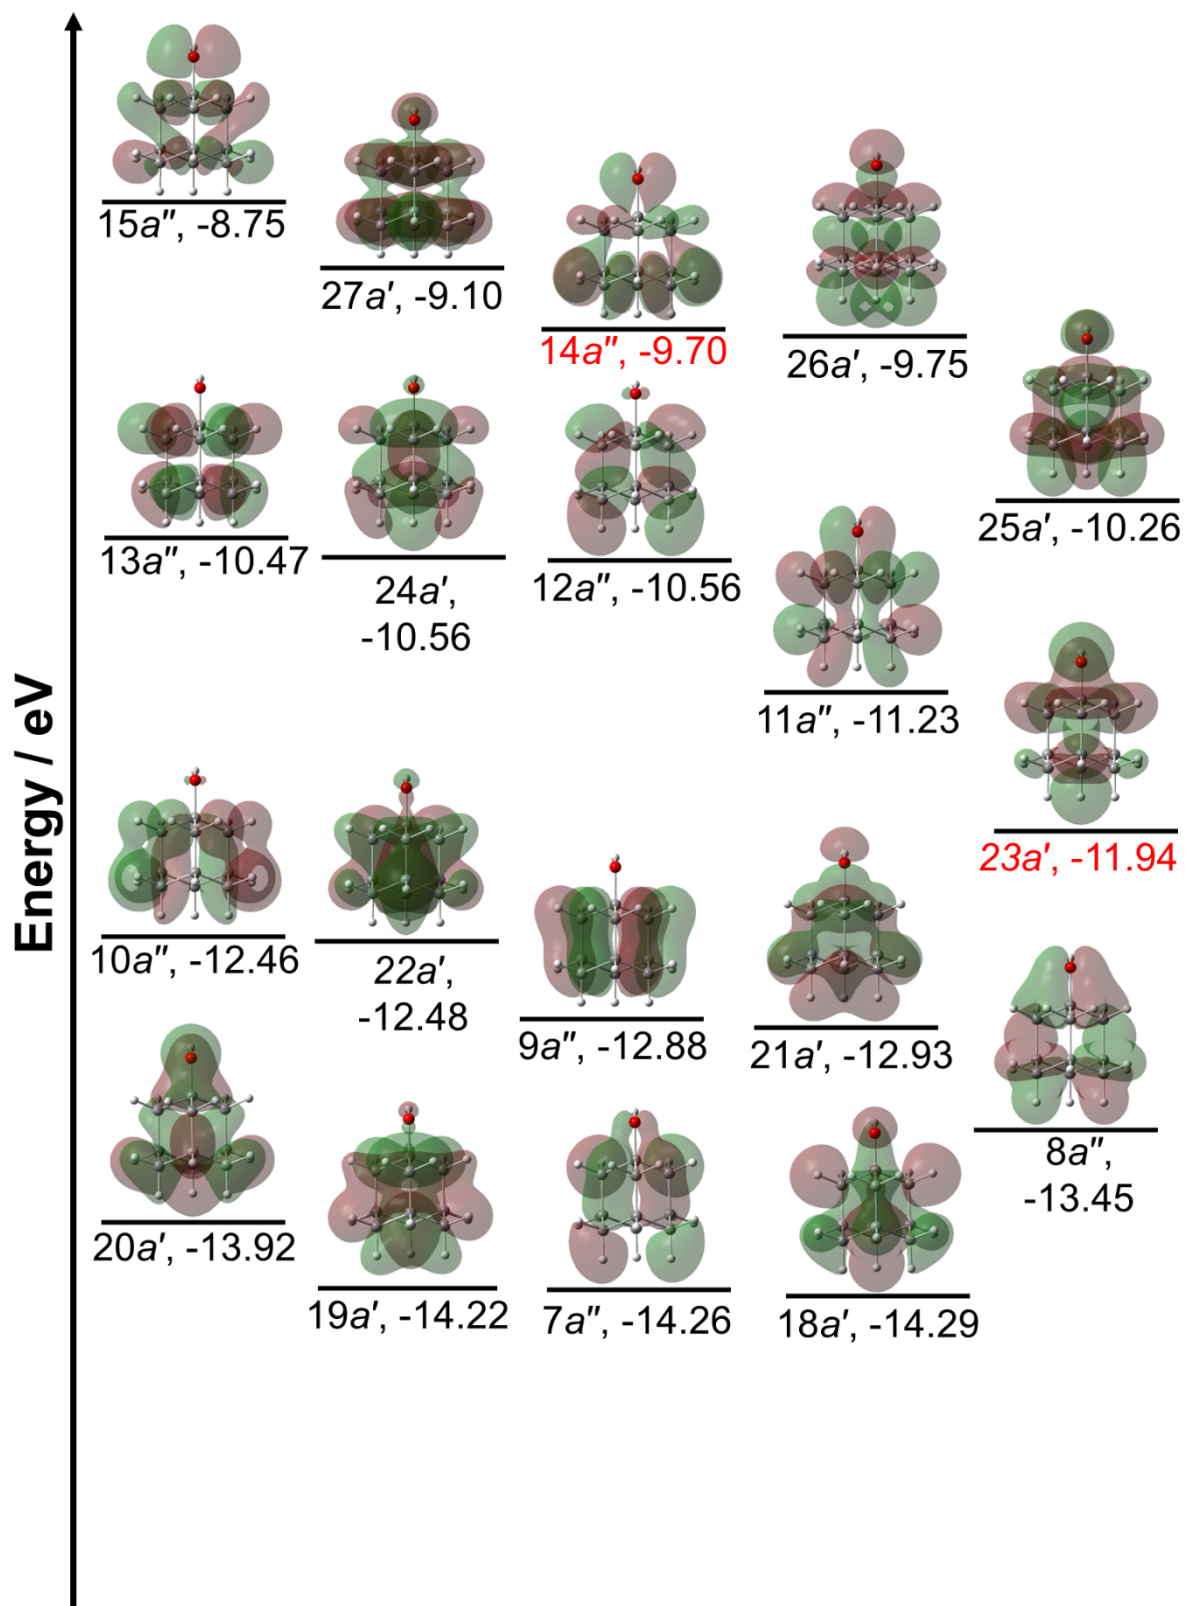

**Figure S8.** Canonical MOs of 1-AdOH at the M06-2X(D3)/cc-pVTZ level with symmetry labels and eigenenergies ( $\epsilon$ ), given in units of eV. Orbitals in red are primarily attributed to the oxygen lone pairs ( $n_o$ ) of the hydroxy group.

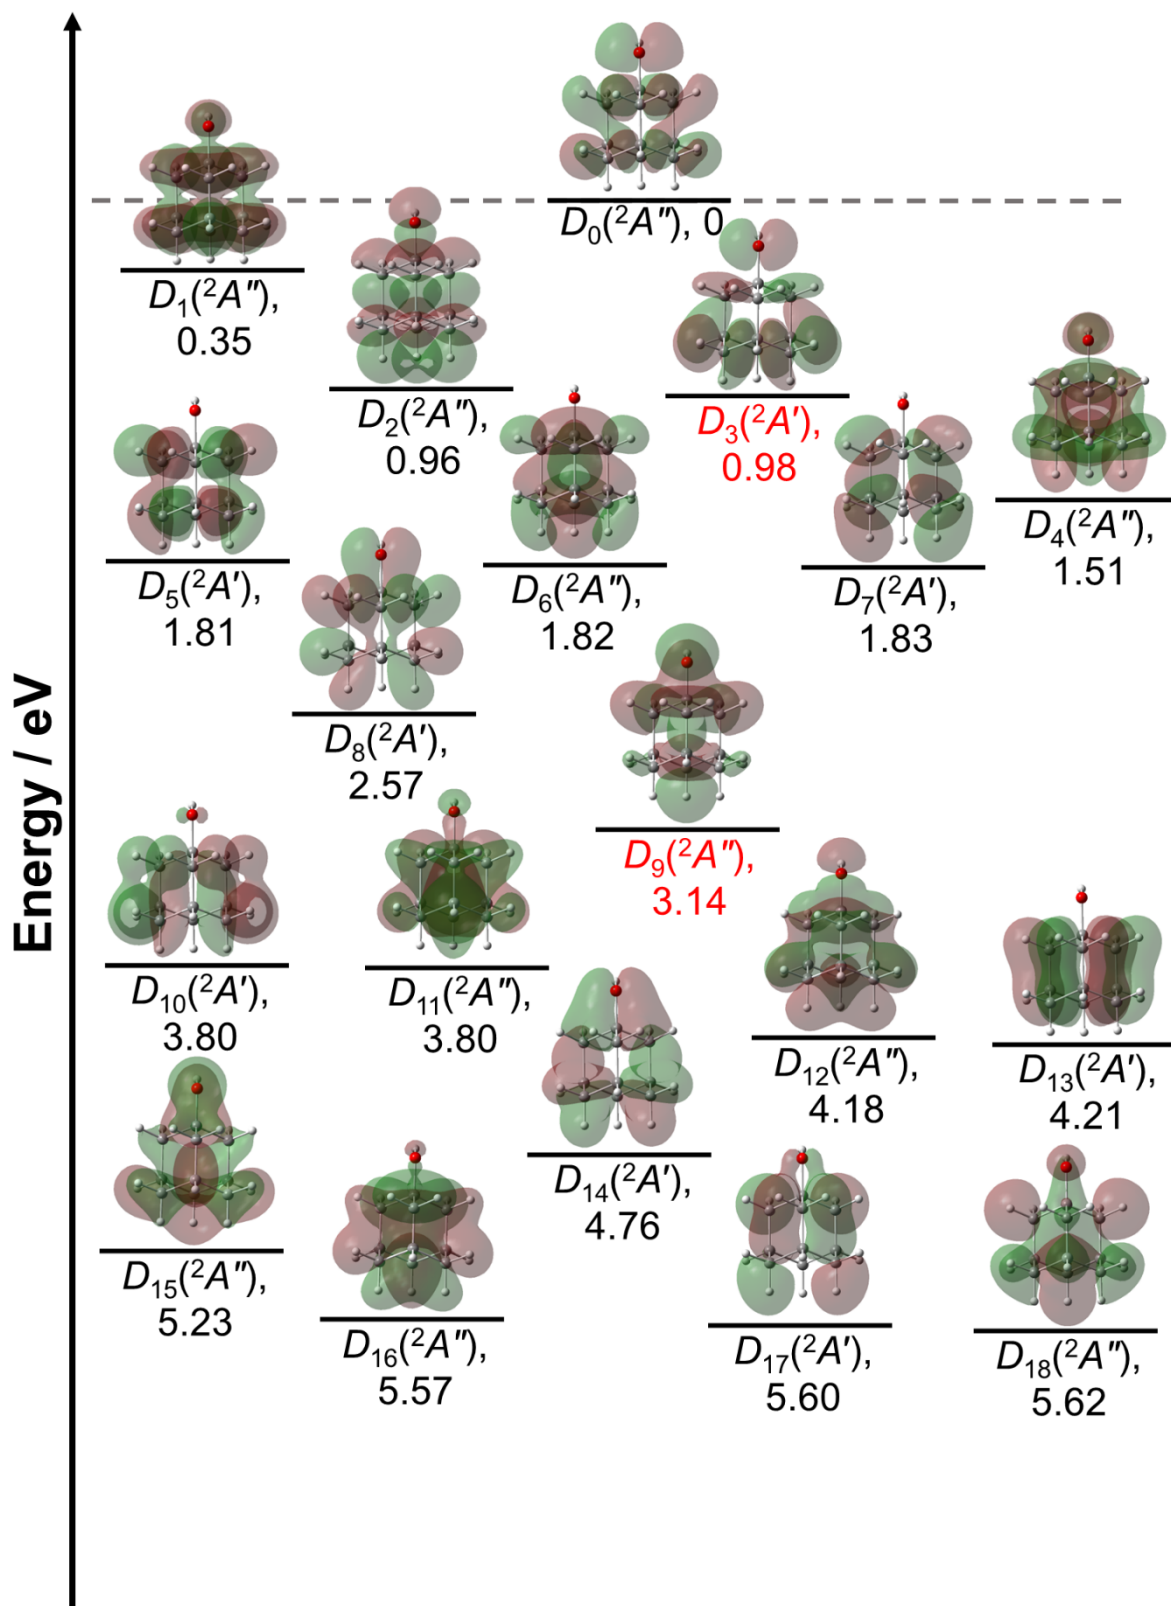

**Figure S9.** NTOs of 1-AdOH<sup>+</sup> at the M06-2X(D3)/cc-pVTZ level in the optimized neutral geometry for the first 18 excited electronic states. All transitions are in the form of SOMO ← SOMO - *n*, where *n* is the number of the excited state. NTOs labeled in red indicate transitions originating from orbitals primarily attributed to the hydroxy group. Energies are given in units of eV.



**Table S8.** Intense FC Excitations of the 1-AdOH  $D_0(^2A) \leftarrow S_0(^1A)$  Transition.

| Transition Energy<br>/ $\text{cm}^{-1}$ <sup>a</sup> | Mode                                        | Intensity $\cdot 10^{-3}$<br>/ $\text{dm}^3 \text{mol}^{-1} \text{cm}^{-1}$ |
|------------------------------------------------------|---------------------------------------------|-----------------------------------------------------------------------------|
| 0                                                    | 0-0                                         | 2.90                                                                        |
| 330                                                  | $\nu_{72}$                                  | 2.83                                                                        |
| 393                                                  | $\nu_{70}$                                  | 1.99                                                                        |
| 407                                                  | $\nu_{69}$                                  | 2.83                                                                        |
| 487                                                  | $\nu_{65}$                                  | 5.93                                                                        |
| 533                                                  | $\nu_{64}$                                  | 5.13                                                                        |
| 817                                                  | $\nu_{65} + \nu_{72}$                       | 5.04                                                                        |
| 863                                                  | $\nu_{64} + \nu_{72}$                       | 4.87                                                                        |
| 879                                                  | $\nu_{65} + \nu_{70}$                       | 3.49                                                                        |
| 893                                                  | $\nu_{65} + \nu_{69}$                       | 5.32                                                                        |
| 926                                                  | $\nu_{64} + 2\nu_{70}$                      | 3.40                                                                        |
| 940                                                  | $\nu_{64} + \nu_{69}$                       | 4.93                                                                        |
| 974                                                  | $2\nu_{65}$                                 | 5.49                                                                        |
| 1020                                                 | $\nu_{64} + \nu_{65}$                       | 10.42                                                                       |
| 1067                                                 | $2\nu_{64}$                                 | 3.95                                                                        |
| 1207                                                 | $\nu_{37}$                                  | 2.88                                                                        |
| 1223                                                 | $\nu_{65} + \nu_{69} + \nu_{72}$            | 3.91                                                                        |
| 1270                                                 | $\nu_{64} + \nu_{69} + \nu_{72}$            | 4.12                                                                        |
| 1304                                                 | $2\nu_{65} + \nu_{72}$                      | 3.97                                                                        |
| 1350                                                 | $\nu_{64} + \nu_{65} + \nu_{72}$            | 8.60                                                                        |
| 1380                                                 | $2\nu_{65} + \nu_{69}$                      | 4.47                                                                        |
| 1397                                                 | $2\nu_{64} + \nu_{72}$                      | 3.62                                                                        |
| 1427                                                 | $\nu_{64} + \nu_{65} + \nu_{69}$            | 9.20                                                                        |
| 1507                                                 | $2\nu_{64} + \nu_{65}$                      | 7.95                                                                        |
| 1694                                                 | $\nu_{37} + \nu_{65}$                       | 5.77                                                                        |
| 1740                                                 | $\nu_{37} + \nu_{64}$                       | 3.61                                                                        |
| 1820                                                 | $\nu_{64} + \nu_{65} + \nu_{69} + \nu_{70}$ | 4.29                                                                        |

<sup>a</sup> Energies are expressed in relation to the 0-0 band located at  $71559 \text{ cm}^{-1}$ .

## 2-ADAMANTANOL

**Table S9.** Assignment of the 2-AdOH PES spectrum using MO eigenvalues of neutral 2-AdOH vs. vertical transition energies of 2-AdOH<sup>+</sup> computed at the M06-2X(D3)/cc-pVTZ level.

| 2-AdOH MOs <sup>a</sup> |                            |     | 2-AdOH <sup>+</sup> TD-DFT |                            |     |         |                            |     |         |
|-------------------------|----------------------------|-----|----------------------------|----------------------------|-----|---------|----------------------------|-----|---------|
| C <sub>1</sub>          |                            |     | Neutral geom. <sup>b</sup> |                            |     |         | Opt. geom. <sup>c</sup>    |     |         |
| MO #                    | <i>IE<sub>v</sub></i> / eV | Sym | State                      | <i>IE<sub>v</sub></i> / eV | Sym | Assign. | <i>IE<sub>v</sub></i> / eV | Sym | Assign. |
| 42                      | 9.67                       | 42a | <i>D</i> <sub>0</sub>      | 9.67                       | A   | 42a     | 9.07                       | A   | 42a     |
| 41                      | 9.86                       | 41a | <i>D</i> <sub>1</sub>      | 9.76                       | A   | 41a     | 11.23                      | A   | 41a     |
| 40                      | 9.97                       | 40a | <i>D</i> <sub>2</sub>      | 9.93                       | A   | 40a     | 11.28                      | A   | 40a     |
| 39                      | 10.34                      | 39a | <i>D</i> <sub>3</sub>      | 10.29                      | A   | 39a     | 11.61                      | A   | 39a     |
| 38                      | 11.00                      | 38a | <i>D</i> <sub>4</sub>      | 10.95                      | A   | 38a     | 12.27                      | A   | 38a     |
| 37                      | 11.22                      | 37a | <i>D</i> <sub>5</sub>      | 11.22                      | A   | 36a     | 12.33                      | A   | 36a     |
| 36                      | 11.29                      | 36a | <i>D</i> <sub>6</sub>      | 11.26                      | A   | 37a     | 12.54                      | A   | 37a     |
| 35                      | 11.69                      | 35a | <i>D</i> <sub>7</sub>      | 11.66                      | A   | 35a     | 13.08                      | A   | 35a     |
| 34                      | 12.14                      | 34a | <i>D</i> <sub>8</sub>      | 12.06                      | A   | 34a     | 13.50                      | A   | 34a     |
| 33                      | 12.69                      | 33a | <i>D</i> <sub>9</sub>      | 12.68                      | A   | 33a     | 13.89                      | A   | 33a     |
| 32                      | 13.20                      | 32a | <i>D</i> <sub>10</sub>     | 13.17                      | A   | 32a     | 14.07                      | A   | 32a     |
| 31                      | 13.27                      | 31a | <i>D</i> <sub>11</sub>     | 13.25                      | A   | 31a     | 14.24                      | A   | 31a     |
| 30                      | 13.36                      | 30a | <i>D</i> <sub>12</sub>     | 13.36                      | A   | 30a     | 14.65                      | A   | 30a     |
| 29                      | 13.64                      | 29a | <i>D</i> <sub>13</sub>     | 13.66                      | A   | 29a     | 14.74                      | A   | 29a     |
| 28                      | 14.04                      | 28a | <i>D</i> <sub>14</sub>     | 14.03                      | A   | 28a     | 15.27                      | A   | 28a     |
| 27                      | 14.58                      | 27a | <i>D</i> <sub>15</sub>     | 14.60                      | A   | 27a     | 15.58                      | A   | 27a     |
| 26                      | 14.95                      | 26a | <i>D</i> <sub>16</sub>     | 14.99                      | A   | 26a     | 16.00                      | A   | 26a     |
| 25                      | 15.19                      | 25a | <i>D</i> <sub>17</sub>     | 15.27                      | A   | 25a     | 16.19                      | A   | 25a     |
| 24                      | 15.41                      | 24a | <i>D</i> <sub>18</sub>     | 15.45                      | A   | 24a     | 16.22                      | A   | 24a     |
| 23                      | 16.43                      | 23a | <i>D</i> <sub>19</sub>     | 16.39                      | A   | 23a     | 16.39                      | A   | 23a     |

<sup>a</sup> Energies are the negative MO eigenenergies ( $-\varepsilon$ ) shifted by +0.82 eV ( $IE_v + \varepsilon_{\text{HOMO}}$ ).

<sup>b</sup> Energies are shifted to match *D*<sub>0</sub> to the calculated first *IE<sub>v</sub>* (9.67 eV).

<sup>c</sup> Energies are shifted to match *D*<sub>0</sub> to the experimental first *IE<sub>a</sub>* (9.07 eV).

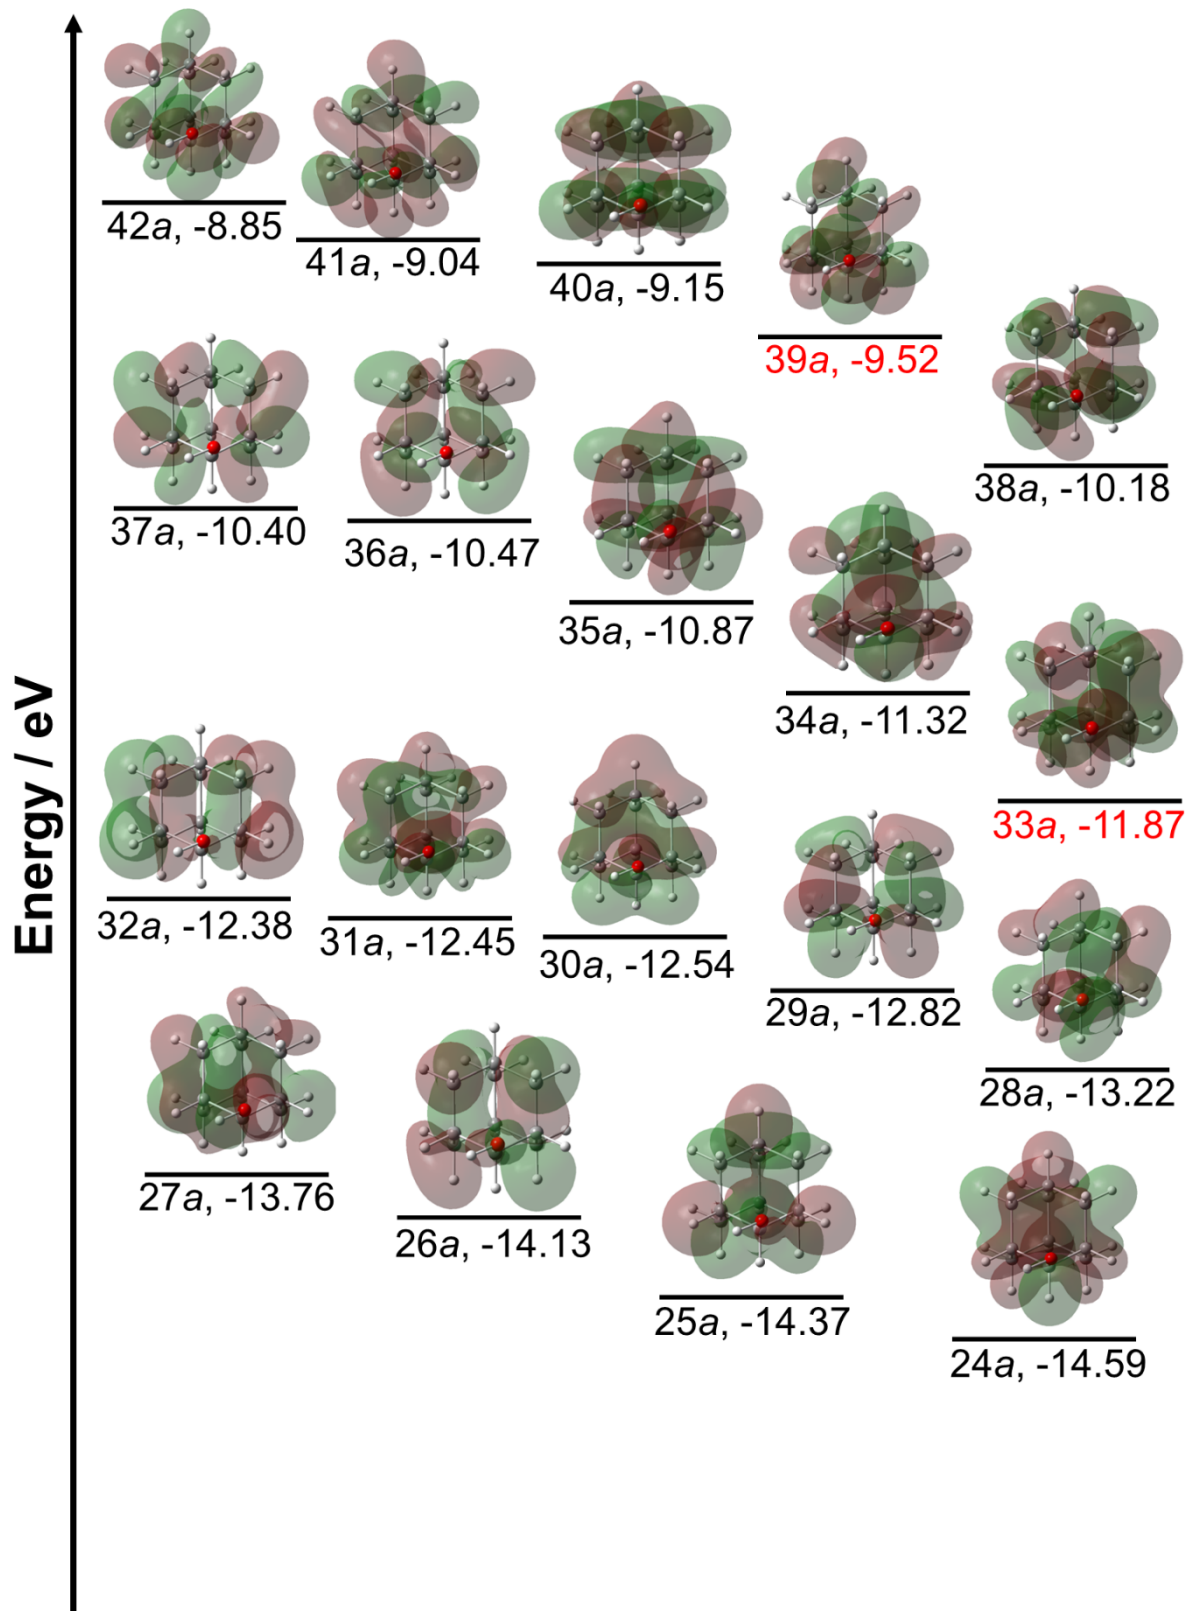

**Figure S10.** Canonical MOs of 2-AdOH at the M06-2X(D3)/cc-pVTZ level with symmetry labels and eigenenergies ( $\epsilon$ ), given in units of eV. Orbitals in red are primarily attributed to the oxygen lone pairs ( $n_o$ ) of the hydroxy group.

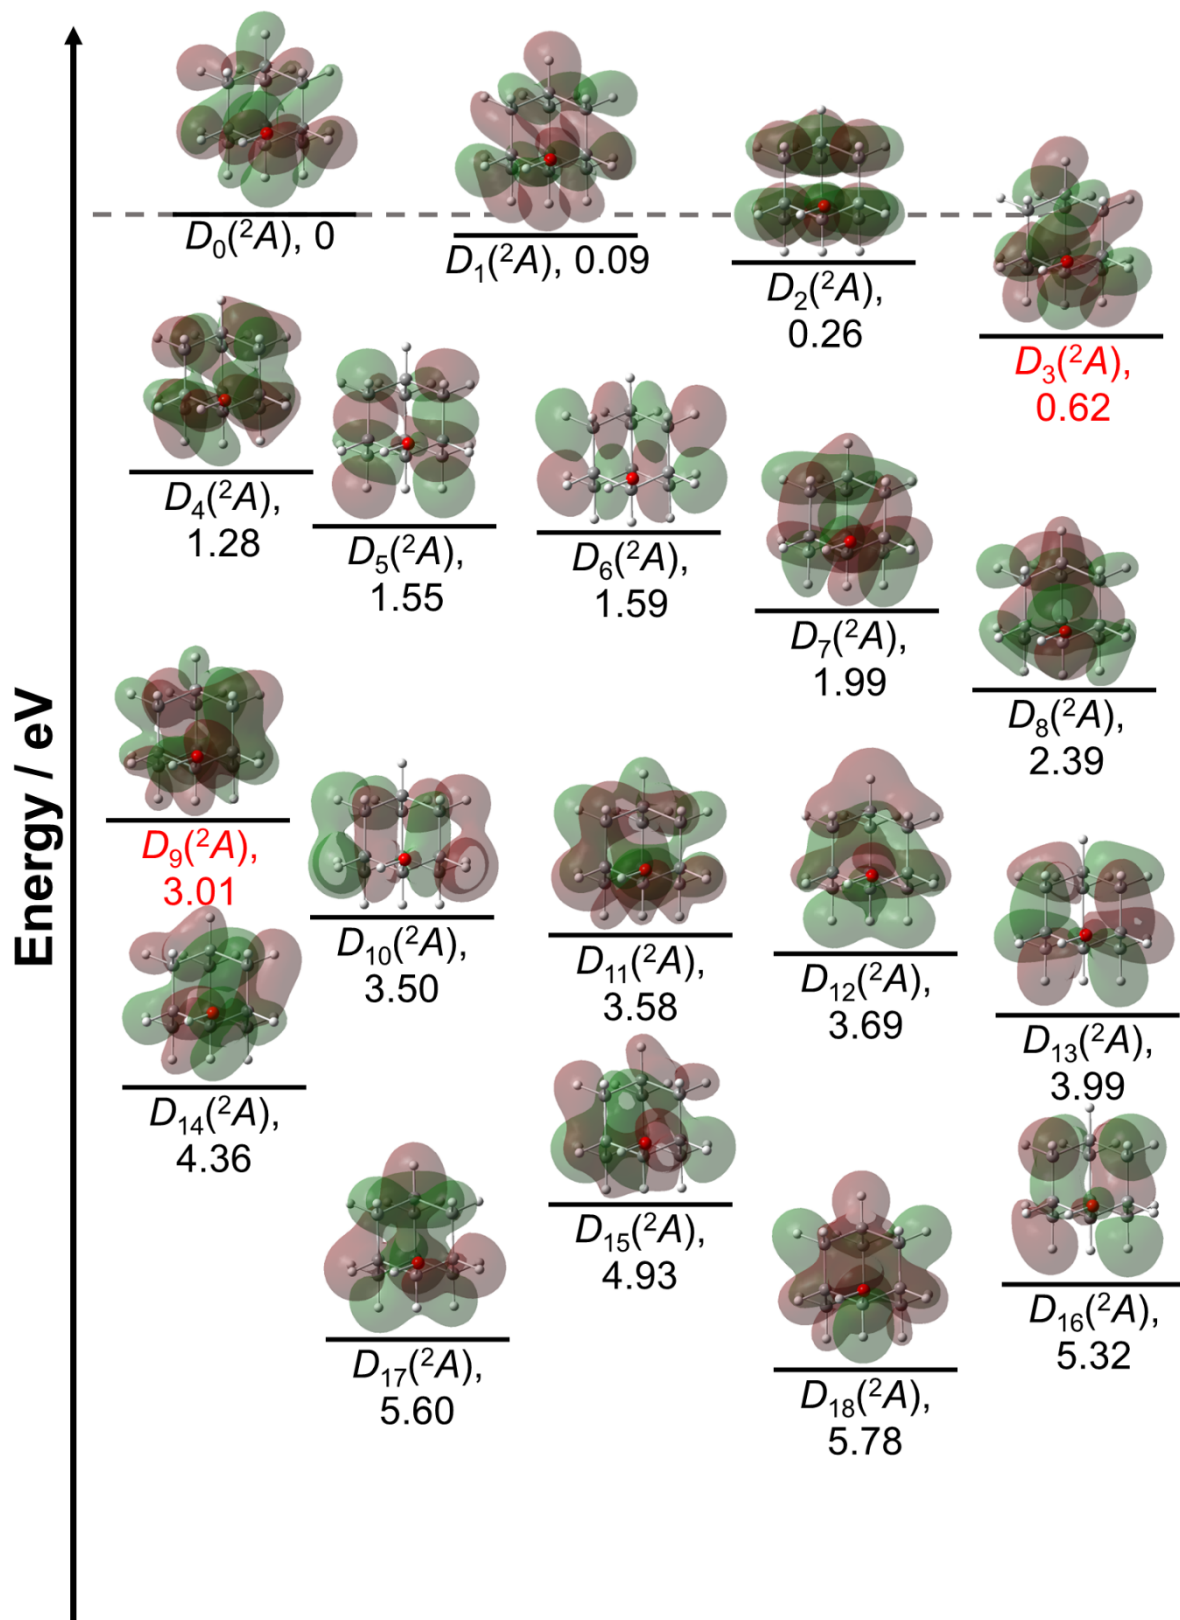

**Figure S11.** NTOs of 2-AdOH<sup>+</sup> at the M06-2X(D3)/cc-pVTZ level in the optimized neutral geometry for the first 18 excited electronic states. All transitions are in the form of SOMO ← SOMO - *n*, where *n* is the number of the excited state. NTOs labeled in red indicate transitions originating from orbitals primarily attributed to the hydroxy group. Energies are given in units of eV.

**Table S10.** Intense FC Excitations of the 2-AdOH  $D_0(^2A) \leftarrow S_0(^1A)$  Transition.

| Transition Energy<br>/ $\text{cm}^{-1}$ <sup>a</sup> | Mode                              | Intensity $\cdot 10^{-4}$<br>/ $\text{dm}^3 \text{mol}^{-1} \text{cm}^{-1}$ |
|------------------------------------------------------|-----------------------------------|-----------------------------------------------------------------------------|
| 0                                                    | 0-0                               | 0.67                                                                        |
| 68                                                   | $\nu_{75}$                        | 2.06                                                                        |
| 135                                                  | $2\nu_{75}$                       | 1.70                                                                        |
| 504                                                  | $\nu_{67} + \nu_{75}$             | 0.72                                                                        |
| 506                                                  | $\nu_{65}$                        | 1.02                                                                        |
| 574                                                  | $\nu_{65} + \nu_{75}$             | 3.16                                                                        |
| 641                                                  | $\nu_{65} + 2\nu_{75}$            | 2.66                                                                        |
| 844                                                  | $\nu_{65} + 5\nu_{75}$            | 0.85                                                                        |
| 848                                                  | $\nu_{65} + \nu_{73} + \nu_{75}$  | 0.72                                                                        |
| 935                                                  | $\nu_{65} + \nu_{70} + \nu_{75}$  | 0.75                                                                        |
| 1011                                                 | $\nu_{65} + \nu_{67} + \nu_{75}$  | 1.03                                                                        |
| 1017                                                 | $\nu_{50} + \nu_{75}$             | 1.03                                                                        |
| 1078                                                 | $\nu_{65} + \nu_{67} + 2\nu_{75}$ | 2.78                                                                        |
| 1080                                                 | $2\nu_{65} + \nu_{75}$            | 1.80                                                                        |
| 1085                                                 | $\nu_{50} + 2\nu_{75}$            | 0.78                                                                        |
| 1147                                                 | $2\nu_{65} + 2\nu_{75}$           | 1.56                                                                        |
| 1263                                                 | $\nu_{38} + \nu_{75}$             | 1.32                                                                        |
| 1331                                                 | $\nu_{38} + 2\nu_{75}$            | 1.03                                                                        |
| 1524                                                 | $\nu_{50} + \nu_{65} + \nu_{75}$  | 1.63                                                                        |
| 1591                                                 | $\nu_{50} + \nu_{65} + 2\nu_{75}$ | 1.26                                                                        |
| 1770                                                 | $\nu_{38} + \nu_{65} + \nu_{75}$  | 1.90                                                                        |
| 1829                                                 | $\nu_{35} + \nu_{65} + \nu_{75}$  | 0.83                                                                        |
| 1837                                                 | $\nu_{38} + \nu_{65} + 2\nu_{75}$ | 1.52                                                                        |

<sup>a</sup> Energies are expressed in relation to the 0-0 band located at  $70958 \text{ cm}^{-1}$ .

## UROTOPINE

**Table S11.** Assignment of the Uro PES spectrum using MO eigenvalues of neutral Uro vs. vertical transition energies of Uro<sup>+</sup> computed at the M06-2X(D3)/cc-pVTZ level.

| Uro MOs <sup>a</sup> |             |        | Uro <sup>+</sup> TD-DFT    |             |       |         |                         |             |       |         |
|----------------------|-------------|--------|----------------------------|-------------|-------|---------|-------------------------|-------------|-------|---------|
| $T_d$                |             |        | Neutral geom. <sup>b</sup> |             |       |         | Opt. geom. <sup>c</sup> |             |       |         |
| MO #                 | $IE_v$ / eV | Sym    | State                      | $IE_v$ / eV | Sym   | Assign. | State                   | $IE_v$ / eV | Sym   | Assign. |
| 38                   | 8.60        |        | $D_0$                      | 8.60        | $A_1$ |         | $D_0$                   | 8.03        | $B_1$ |         |
| 37                   | 8.60        | $7t_2$ | $D_1$                      | 8.79        | $E$   | $7t_2$  | $D_1$                   | 8.68        | $B_1$ | $7t_2$  |
| 36                   | 8.60        |        |                            | 8.79        | $E$   |         | $D_2$                   | 8.92        | $A_2$ |         |
| 35                   | 12.39       |        | $D_2$                      | 12.45       | $A_2$ |         | $D_3$                   | 12.87       | $B_2$ | $3e$    |
| 34                   | 12.39       | $2t_1$ | $D_3$                      | 12.45       | $E$   | $2t_1$  | $D_4$                   | 12.90       | $A_1$ | $2t_1$  |
| 33                   | 12.39       |        |                            | 12.45       | $E$   |         | $D_5$                   | 12.92       | $B_1$ | $3e$    |
| 32                   | 12.84       | $3e$   | $D_4$                      | 12.76       | $A_1$ | $3e$    | $D_6$                   | 13.15       | $A_2$ | $2t_1$  |
| 31                   | 12.84       |        | $D_5$                      | 12.77       | $A_2$ |         | $D_7$                   | 13.27       | $B_2$ | $2t_1$  |
| 30                   | 12.92       | $5a_1$ | $D_6$                      | 12.82       | $A_1$ | $5a_1$  | $D_8$                   | 13.61       | $B_1$ | $5a_1$  |
| 29                   | 13.23       |        | $D_7$                      | 13.19       | $A_1$ |         | $D_9$                   | 13.62       | $A_1$ |         |
| 28                   | 13.23       | $6t_2$ | $D_8$                      | 13.19       | $E$   | $6t_2$  | $D_{10}$                | 13.92       | $A_2$ | $6t_2$  |
| 27                   | 13.23       |        |                            | 13.19       | $E$   |         | $D_{11}$                | 13.98       | $B_1$ |         |
| 26                   | 15.68       |        | $D_9$                      | 15.55       | $A_2$ |         | $D_{12}$                | 15.61       | $A_1$ |         |
| 25                   | 15.68       | $1t_1$ | $D_{10}$                   | 15.57       | $E$   | $1t_1$  | $D_{13}$                | 15.82       | $B_2$ | $1t_1$  |
| 24                   | 15.68       |        |                            | 15.57       | $E$   |         | $D_{14}$                | 16.14       | $A_2$ |         |
| 23                   | 16.27       |        | $D_{11}$                   | 16.32       | $A_1$ |         | $D_{15}$                | 16.81       | $A_1$ |         |
| 22                   | 16.27       | $5t_2$ | $D_{12}$                   | 16.33       | $E$   | $5t_2$  | $D_{16}$                | 16.81       | $A_2$ | $5t_2$  |
| 21                   | 16.27       |        |                            | 16.33       | $E$   |         | $D_{17}$                | 17.01       | $B_1$ |         |

<sup>a</sup> Energies are the negative MO eigenenergies ( $-\varepsilon$ ) shifted by +0.83 eV ( $IE_v + \varepsilon_{\text{HOMO}}$ ).

<sup>b</sup> Energies are shifted to match  $D_0$  to the calculated first  $IE_v$  (8.60 eV).

<sup>c</sup> Energies are shifted to match  $D_0$  to the experimental first  $IE_a$  (8.03 eV).

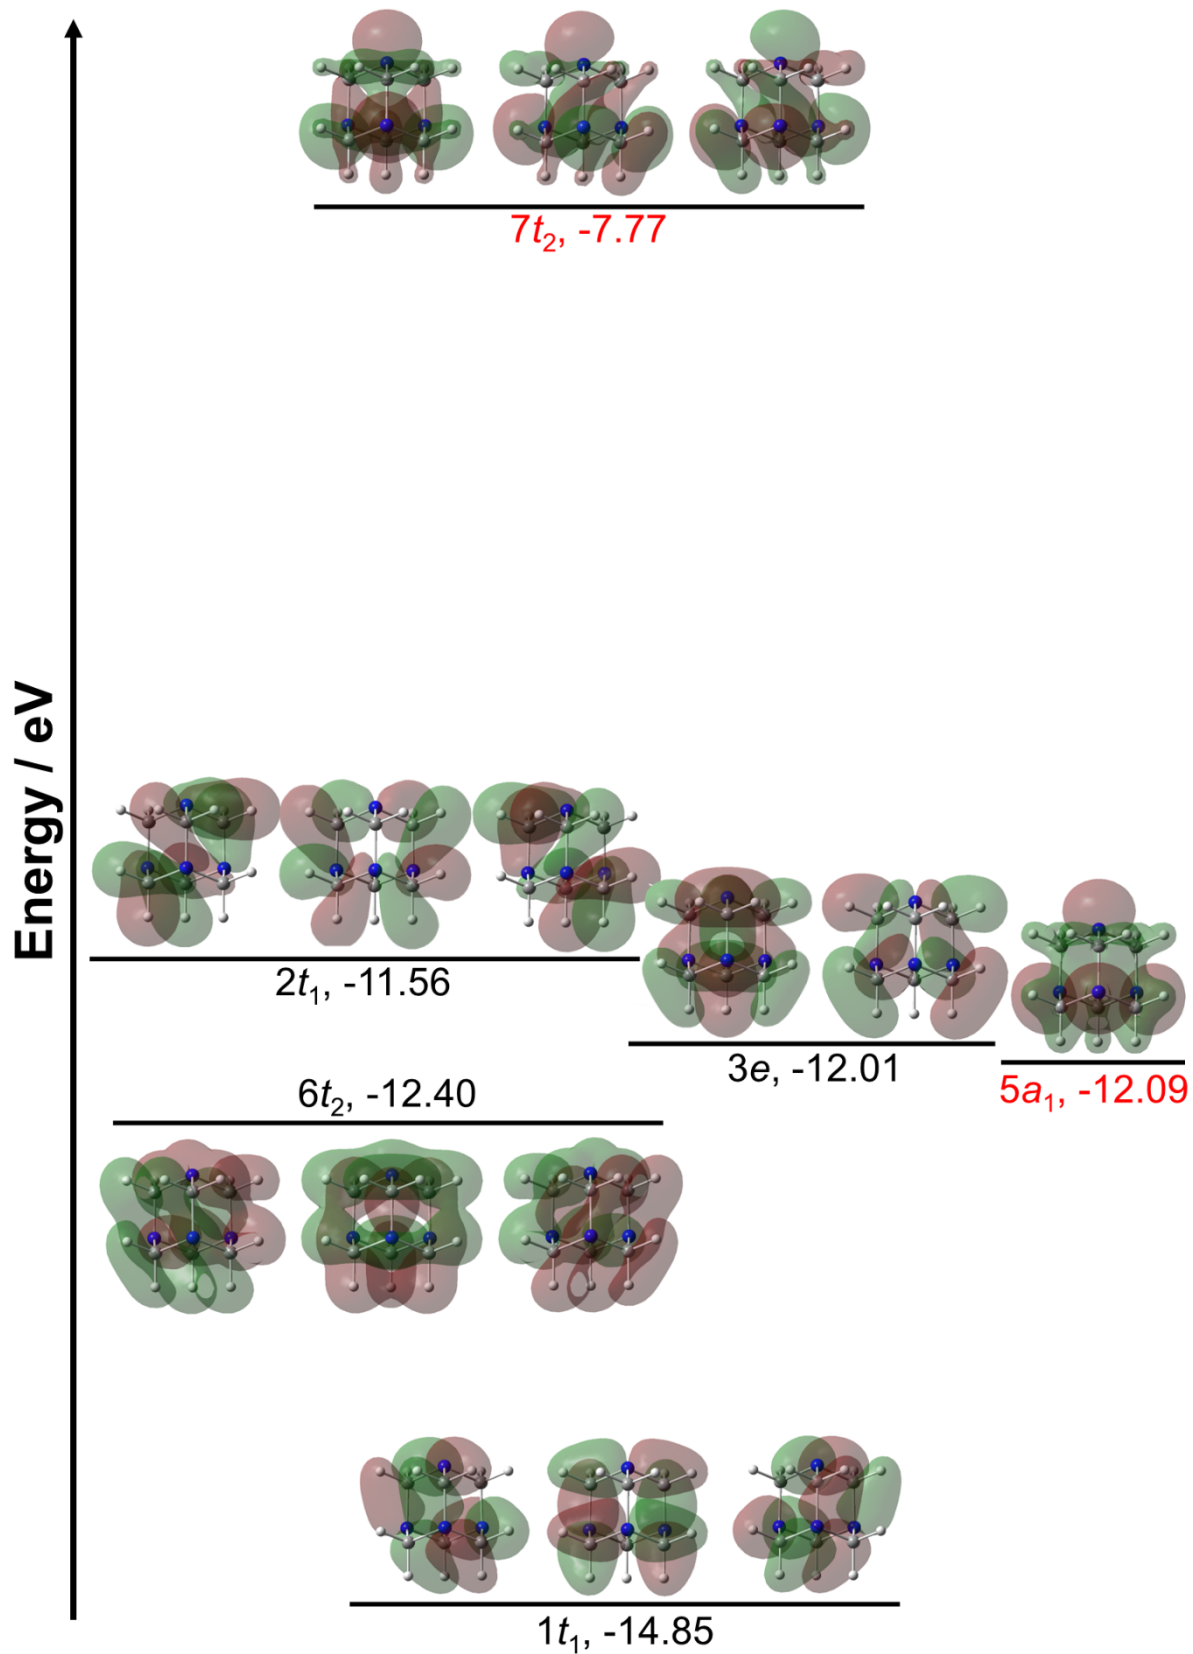

**Figure S12.** Canonical MOs of Uro at the M06-2X(D3)/cc-pVTZ level with symmetry labels and eigenenergies ( $\epsilon$ ), given in units of eV. Orbitals in red are primarily attributed to the four nitrogen lone pairs ( $n_N$ ).

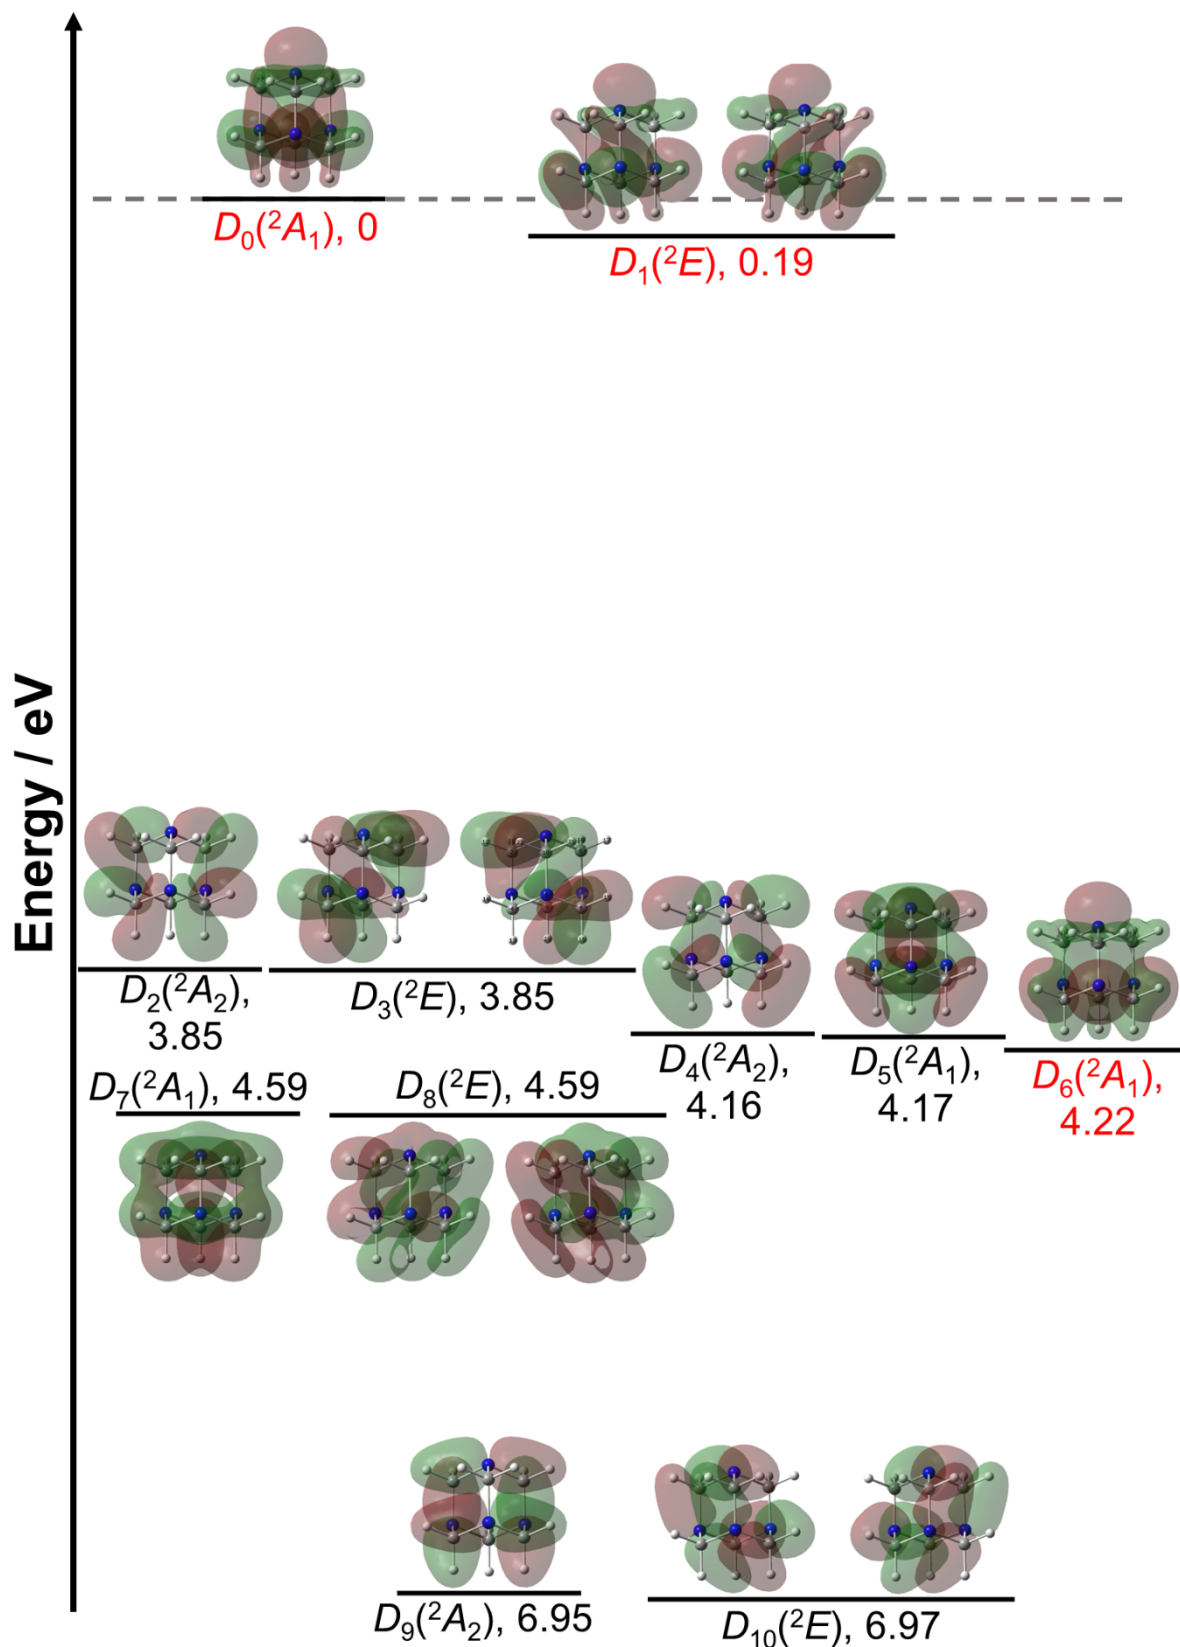

**Figure S13.** NTOs of Uro at the M06-2X(D3)/cc-pVTZ level in the optimized neutral geometry for the first 10 excited electronic states. All transitions are in the form of SOMO  $\leftarrow$  SOMO  $- n$ , where  $n$  is the number of the excited state. NTOs labeled in red indicate transitions originating from orbitals primarily attributed to the N atoms. Energies are given in units of eV.



**Table S12.** Intense Calculated FC Excitations of the Uro  $D_0(^1B_1) \leftarrow S_0(^2A_1)$  Transition.

| Transition Energy<br>/ $\text{cm}^{-1}$ <sup>a</sup> | Mode                                        | Intensity $\cdot 10^{-5}$<br>/ $\text{dm}^3 \text{mol}^{-1} \text{cm}^{-1}$ |
|------------------------------------------------------|---------------------------------------------|-----------------------------------------------------------------------------|
| 0                                                    | 0-0                                         | 1.93                                                                        |
| 451                                                  | $\nu_{18}$                                  | 2.17                                                                        |
| 518                                                  | $\nu_{17}$                                  | 1.48                                                                        |
| 647                                                  | $\nu_{16}$                                  | 2.86                                                                        |
| 969                                                  | $\nu_{17} + \nu_{18}$                       | 1.64                                                                        |
| 1019                                                 | $\nu_{12}$                                  | 1.51                                                                        |
| 1099                                                 | $\nu_{16} + \nu_{17}$                       | 3.11                                                                        |
| 1165                                                 | $2\nu_{16}$                                 | 2.04                                                                        |
| 1470                                                 | $\nu_{12} + \nu_{18}$                       | 1.68                                                                        |
| 1550                                                 | $\nu_{16} + 2\nu_{18}$                      | 1.62                                                                        |
| 1617                                                 | $\nu_{16} + \nu_{17} + \nu_{18}$            | 2.28                                                                        |
| 1666                                                 | $\nu_{12} + \nu_{16}$                       | 2.20                                                                        |
| 1712                                                 | $\nu_{11} + \nu_{16}$                       | 1.33                                                                        |
| 1746                                                 | $2\nu_{16} + \nu_{18}$                      | 2.15                                                                        |
| 1813                                                 | $2\nu_{16} + \nu_{17}$                      | 1.46                                                                        |
| 1988                                                 | $\nu_{13} + \nu_{17} + \nu_{18}$            | 1.28                                                                        |
| 2118                                                 | $\nu_{13} + \nu_{16} + \nu_{18}$            | 2.37                                                                        |
| 2164                                                 | $\nu_{11} + \nu_{16} + \nu_{18}$            | 1.41                                                                        |
| 2184                                                 | $\nu_{12} + \nu_{16} + \nu_{17}$            | 1.64                                                                        |
| 2264                                                 | $2\nu_{16} + \nu_{17} + \nu_{18}$           | 1.52                                                                        |
| 2314                                                 | $\nu_{12} + 2\nu_{16}$                      | 1.54                                                                        |
| 2569                                                 | $\nu_{12} + \nu_{16} + 2\nu_{18}$           | 1.22                                                                        |
| 2636                                                 | $\nu_{12} + \nu_{16} + \nu_{17} + \nu_{18}$ | 1.74                                                                        |
| 2765                                                 | $\nu_{12} + 2\nu_{16} + \nu_{18}$           | 1.60                                                                        |

<sup>a</sup> Energies are expressed in relation to the 0-0 band located at  $62079 \text{ cm}^{-1}$ .

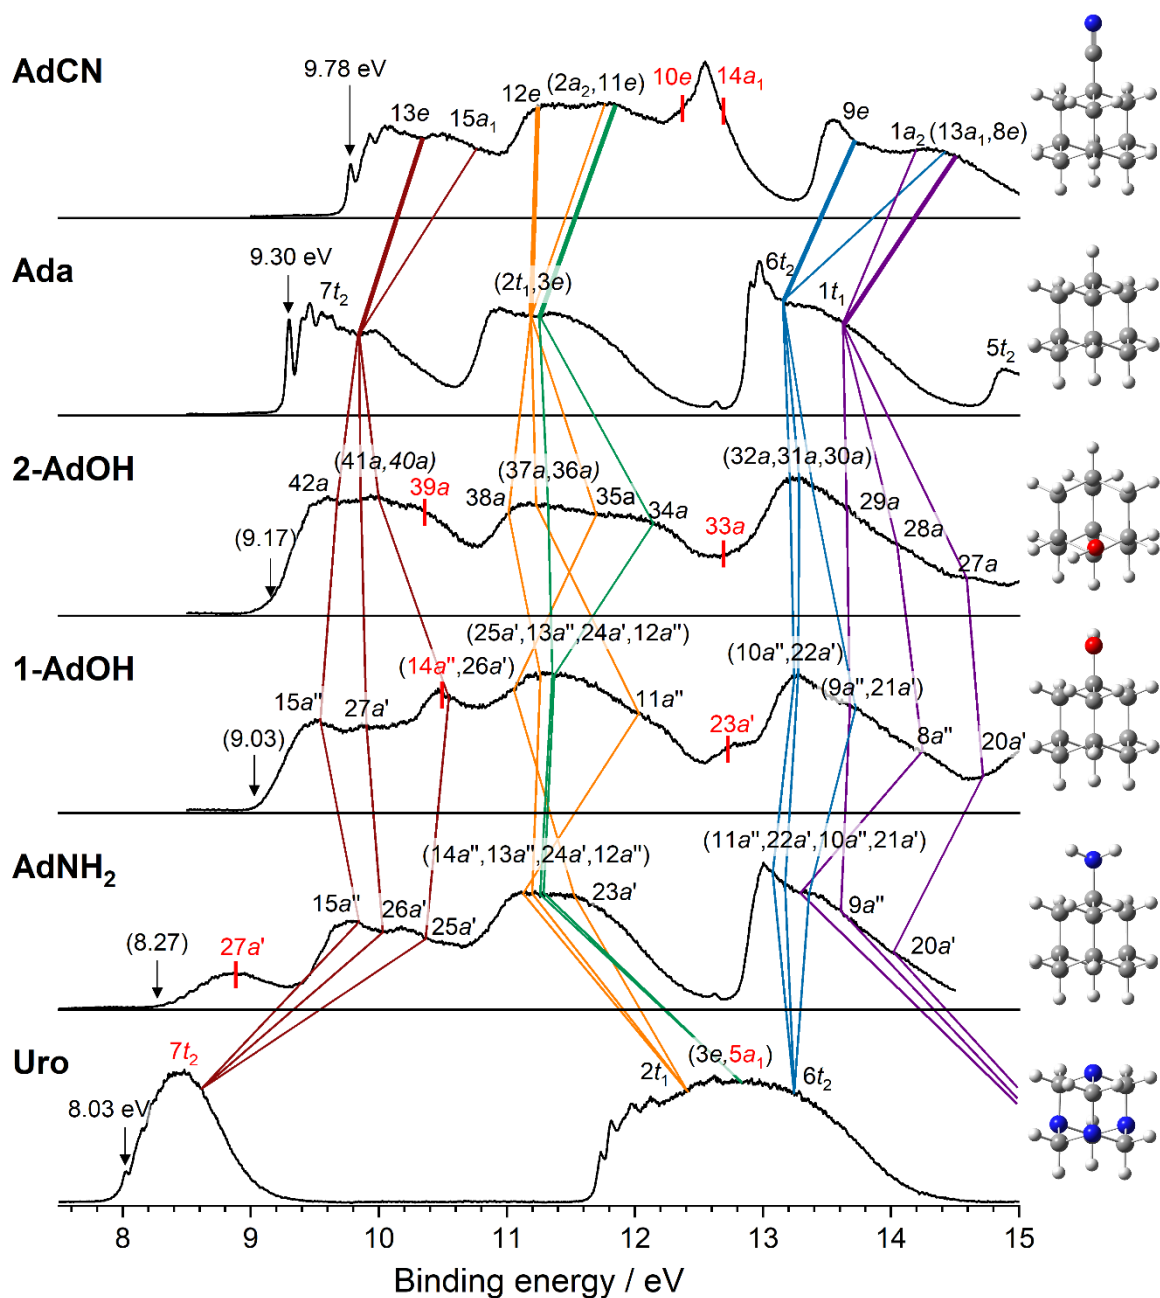

**Figure 14.** All PES spectra (from Figure 1) with illustrated orbital correlations. Lines cross the spectral bands at the energies predicted by KT-DFT at the M06-2X(D3)/cc-pVTZ level and are colored according to how the MOs of each molecule correlate with the MOs of Ada ( $7t_2$ ,  $2t_1$ , etc.).

**Figure S15.** Correlation of MOs of Ada with MOs of its functionalized derivatives.  
MO number is indicated in bold and eigenenergies are given in eV.

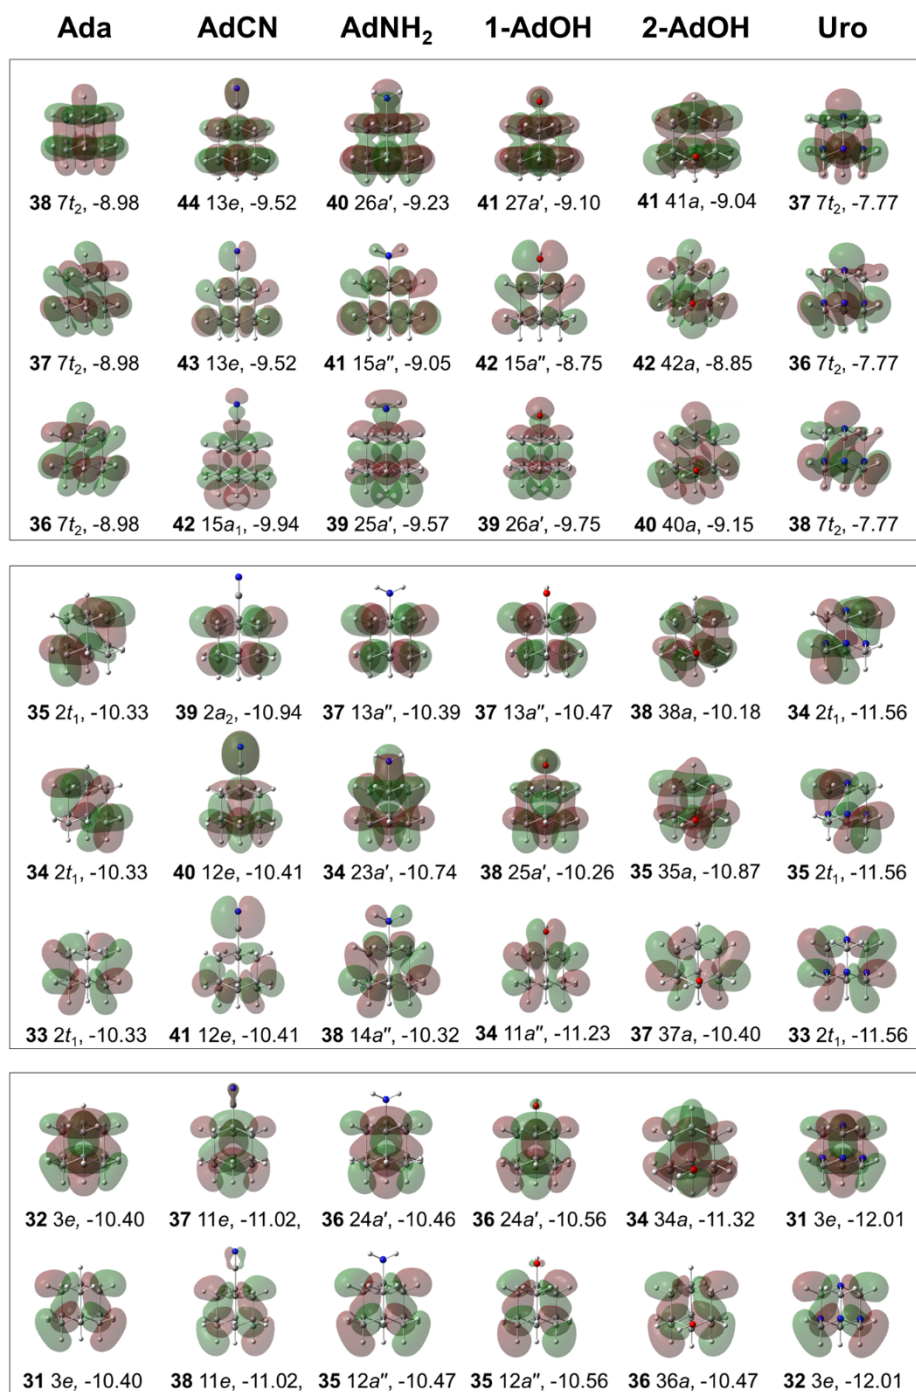

Figure S15. (Continued)

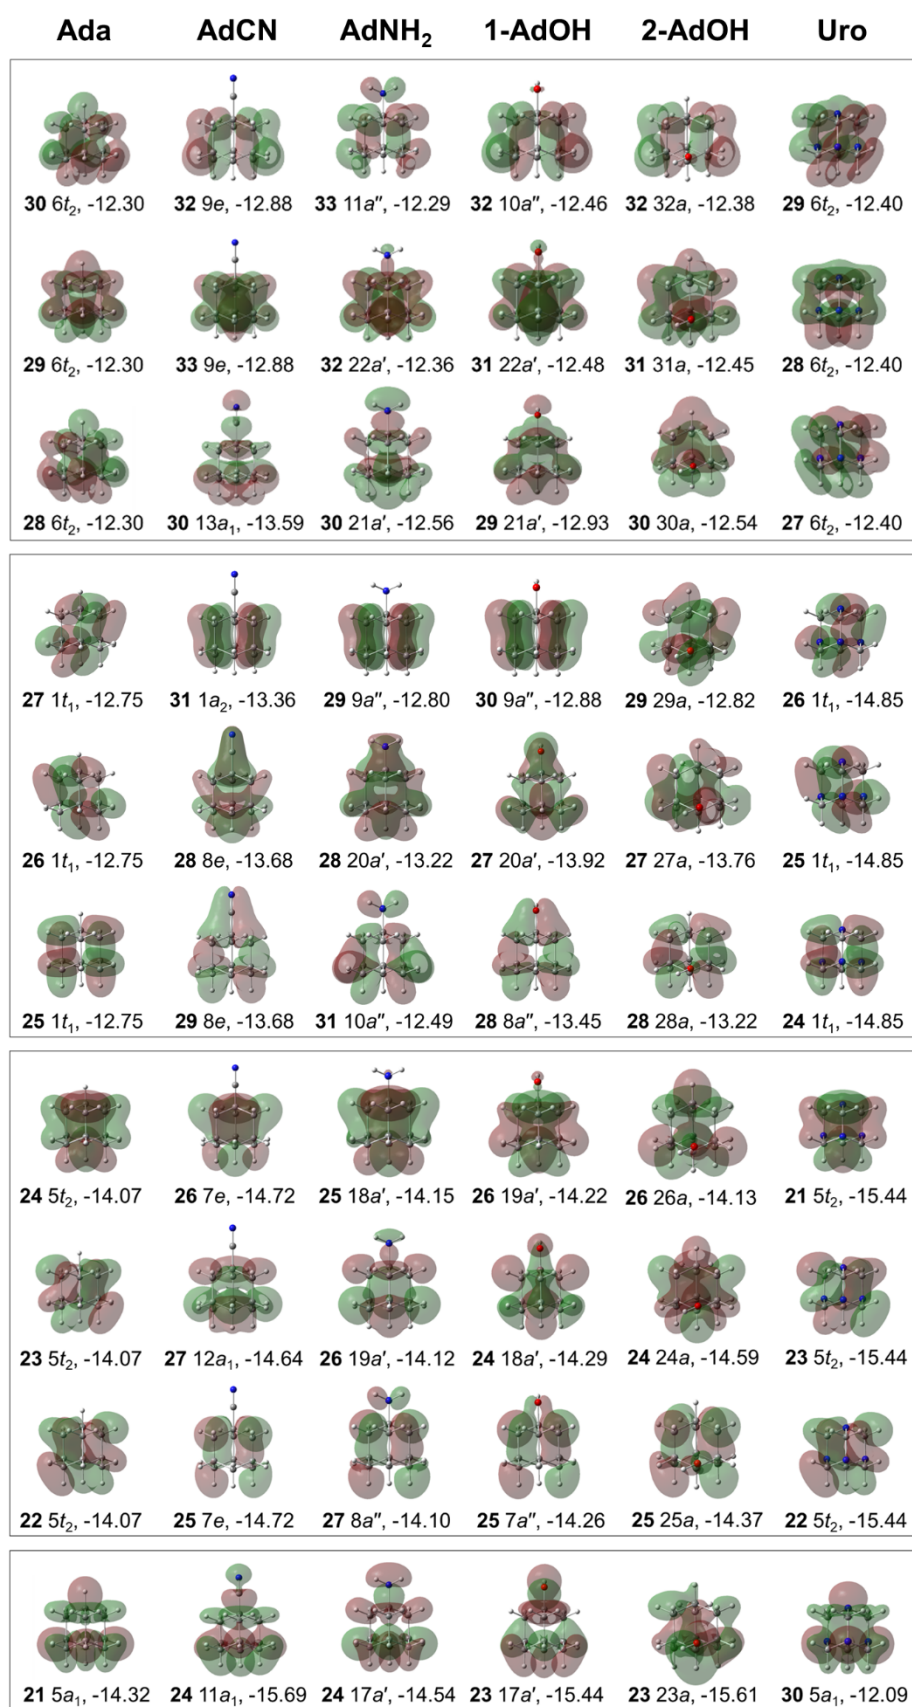

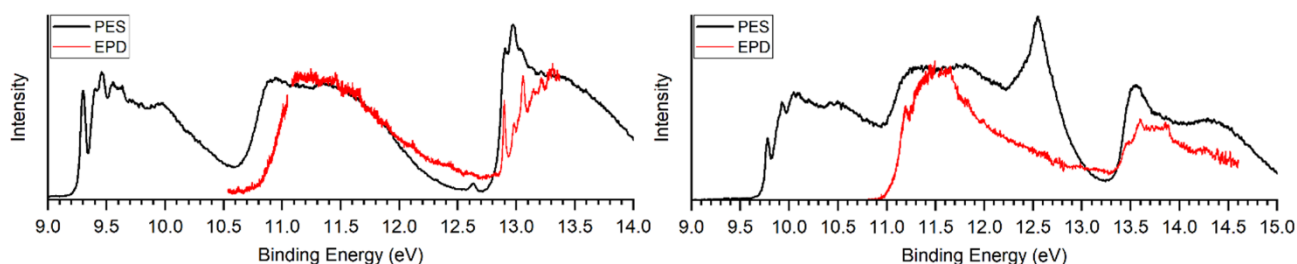

**Figure S16.** Comparison of PES spectra (black) with EPD spectra (red) of Ada/Ada<sup>+</sup> (left) and AdCN/AdCN<sup>+</sup> (right). The EPD spectra are taken from ref. 34 and 36 and have been shifted by the experimentally determined  $I E_a$  for direct comparison of the ionic states.

**Cartesian coordinates (Å) and energies (hartree) of relevant structures (M06-2X(D3)/cc-pVTZ)**

| Ada ( $S_0, D_0^*$ )          |   |           |           |           | Ada <sup>+</sup> ( $D_0$ ) |                           |           |           |           |  |             |
|-------------------------------|---|-----------|-----------|-----------|----------------------------|---------------------------|-----------|-----------|-----------|--|-------------|
| 1                             | 6 | 0.000000  | 1.769062  | 0.000000  | 1                          | 6                         | -1.260116 | 0.727528  | -0.997643 |  |             |
| 2                             | 1 | 0.622799  | 2.416831  | -0.622799 | 2                          | 1                         | -1.308798 | 0.755635  | -2.094489 |  |             |
| 3                             | 1 | -0.622799 | 2.416831  | 0.622799  | 3                          | 1                         | -2.153255 | 1.243182  | -0.642562 |  |             |
| 4                             | 6 | 0.886717  | 0.886717  | 0.886717  | 4                          | 6                         | 0.000000  | 1.443712  | -0.550461 |  |             |
| 5                             | 1 | 1.517000  | 1.517000  | 1.517000  | 5                          | 1                         | 0.000000  | 2.492766  | -0.847096 |  |             |
| 6                             | 6 | -0.886717 | 0.886717  | -0.886717 | 6                          | 6                         | -1.250291 | -0.721856 | -0.550461 |  |             |
| 7                             | 1 | -1.517000 | 1.517000  | -1.517000 | 7                          | 1                         | -2.158798 | -1.246383 | -0.847096 |  |             |
| 8                             | 6 | 0.000000  | 0.000000  | -1.769062 | 8                          | 6                         | 0.000000  | -1.455057 | -0.997643 |  |             |
| 9                             | 1 | 0.622799  | 0.622799  | -2.416831 | 9                          | 1                         | 0.000000  | -1.511269 | -2.094489 |  |             |
| 10                            | 1 | -0.622799 | -0.622799 | -2.416831 | 10                         | 1                         | 0.000000  | -2.486365 | -0.642562 |  |             |
| 11                            | 6 | 1.769062  | 0.000000  | 0.000000  | 11                         | 6                         | 1.260116  | 0.727528  | -0.997643 |  |             |
| 12                            | 1 | 2.416831  | -0.622799 | 0.622799  | 12                         | 1                         | 2.153255  | 1.243182  | -0.642562 |  |             |
| 13                            | 1 | 2.416831  | 0.622799  | -0.622799 | 13                         | 1                         | 1.308798  | 0.755635  | -2.094489 |  |             |
| 14                            | 6 | 0.886717  | -0.886717 | -0.886717 | 14                         | 6                         | 1.250291  | -0.721856 | -0.550461 |  |             |
| 15                            | 1 | 1.517000  | -1.517000 | -1.517000 | 15                         | 1                         | 2.158798  | -1.246383 | -0.847096 |  |             |
| 16                            | 6 | 0.000000  | -1.769062 | 0.000000  | 16                         | 6                         | 1.256512  | -0.725448 | 1.054956  |  |             |
| 17                            | 1 | -0.622799 | -2.416831 | -0.622799 | 17                         | 1                         | 1.268305  | -1.760065 | 1.393263  |  |             |
| 18                            | 1 | 0.622799  | -2.416831 | 0.622799  | 18                         | 1                         | 2.158413  | -0.218352 | 1.393263  |  |             |
| 19                            | 6 | 0.000000  | 0.000000  | 1.769062  | 19                         | 6                         | 0.000000  | 1.450895  | 1.054956  |  |             |
| 20                            | 1 | -0.622799 | 0.622799  | 2.416831  | 20                         | 1                         | -0.890108 | 1.978417  | 1.393263  |  |             |
| 21                            | 1 | 0.622799  | -0.622799 | 2.416831  | 21                         | 1                         | 0.890108  | 1.978417  | 1.393263  |  |             |
| 22                            | 6 | -1.769062 | 0.000000  | 0.000000  | 22                         | 6                         | -1.256512 | -0.725448 | 1.054956  |  |             |
| 23                            | 1 | -2.416831 | 0.622799  | 0.622799  | 23                         | 1                         | -2.158413 | -0.218352 | 1.393263  |  |             |
| 24                            | 1 | -2.416831 | -0.622799 | -0.622799 | 24                         | 1                         | -1.268305 | -1.760065 | 1.393263  |  |             |
| 25                            | 6 | -0.886717 | -0.886717 | 0.886717  | 25                         | 6                         | 0.000000  | 0.000000  | 1.448732  |  |             |
| 26                            | 1 | -1.517000 | -1.517000 | 1.517000  | 26                         | 1                         | 0.000000  | 0.000000  | 2.577139  |  |             |
| Electronic energy $E_n$ :     |   |           |           |           | -390.680696                | Electronic energy $E_+$ : |           |           |           |  | -390.335772 |
| ZPE <sub>n</sub> :            |   |           |           |           | 0.245654                   | ZPE <sub>+</sub> :        |           |           |           |  | 0.235062    |
| Electronic energy $E_{n^*}$ : |   |           |           |           | -390.319338                |                           |           |           |           |  |             |

**AdCN (S<sub>0</sub>, D<sub>0</sub><sup>\*</sup>)**

|    |   |           |           |           |
|----|---|-----------|-----------|-----------|
| 1  | 6 | -1.252060 | 0.722877  | -1.525888 |
| 2  | 1 | -2.150291 | 1.241471  | -1.181481 |
| 3  | 1 | -1.268767 | 0.732523  | -2.618317 |
| 4  | 6 | -1.252781 | -0.723294 | -1.017408 |
| 5  | 1 | -2.145590 | -1.238757 | -1.374502 |
| 6  | 6 | 0.000000  | 1.446587  | -1.017408 |
| 7  | 1 | 0.000000  | 2.477514  | -1.374502 |
| 8  | 6 | 0.000000  | 1.453132  | 0.514282  |
| 9  | 1 | -0.880935 | 1.972919  | 0.896655  |
| 10 | 1 | 0.880935  | 1.972919  | 0.896655  |
| 11 | 6 | -1.258450 | -0.726566 | 0.514282  |
| 12 | 1 | -1.268130 | -1.749372 | 0.896655  |
| 13 | 1 | -2.149065 | -0.223547 | 0.896655  |
| 14 | 6 | 1.258450  | -0.726566 | 0.514282  |
| 15 | 1 | 2.149065  | -0.223547 | 0.896655  |
| 16 | 1 | 1.268130  | -1.749372 | 0.896655  |
| 17 | 6 | 0.000000  | -1.445754 | -1.525888 |
| 18 | 1 | 0.000000  | -1.465046 | -2.618317 |
| 19 | 1 | 0.000000  | -2.482942 | -1.181481 |
| 20 | 6 | 1.252060  | 0.722877  | -1.525888 |
| 21 | 1 | 1.268767  | 0.732523  | -2.618317 |
| 22 | 1 | 2.150291  | 1.241471  | -1.181481 |
| 23 | 6 | 1.252781  | -0.723294 | -1.017408 |
| 24 | 1 | 2.145590  | -1.238757 | -1.374502 |
| 25 | 6 | 0.000000  | 0.000000  | 1.031848  |
| 26 | 6 | 0.000000  | 0.000000  | 2.495530  |
| 27 | 7 | 0.000000  | 0.000000  | 3.642991  |

Electronic energy E<sub>n</sub>: -482.930848  
 ZPE<sub>n</sub>: 0.243890  
 Electronic energy E<sub>+\*</sub>: -482.550812

**AdCN<sup>+</sup> (D<sub>0</sub>)**

|    |   |           |           |           |
|----|---|-----------|-----------|-----------|
| 1  | 6 | -0.796889 | -1.533822 | 1.257851  |
| 2  | 1 | -1.256402 | -1.150104 | 2.167490  |
| 3  | 1 | -0.801167 | -2.621321 | 1.268129  |
| 4  | 6 | 0.734785  | -1.013671 | 1.248052  |
| 5  | 1 | 1.158229  | -1.423779 | 2.166583  |
| 6  | 6 | -1.388461 | -0.958060 | 0.000000  |
| 7  | 1 | -2.443176 | -1.355085 | 0.000000  |
| 8  | 6 | -1.440476 | 0.546495  | 0.000000  |
| 9  | 1 | -1.936877 | 0.939952  | 0.885940  |
| 10 | 1 | -1.936877 | 0.939952  | -0.885940 |
| 11 | 6 | 0.734785  | 0.499101  | 1.265990  |
| 12 | 1 | 1.765334  | 0.866773  | 1.303358  |
| 13 | 1 | 0.239110  | 0.883288  | 2.158241  |
| 14 | 6 | 0.734785  | 0.499101  | -1.265990 |
| 15 | 1 | 0.239110  | 0.883288  | -2.158241 |
| 16 | 1 | 1.765334  | 0.866773  | -1.303358 |
| 17 | 6 | 1.369021  | -1.587296 | 0.000000  |
| 18 | 1 | 1.346018  | -2.676623 | 0.000000  |
| 19 | 1 | 2.431916  | -1.296393 | 0.000000  |
| 20 | 6 | -0.796889 | -1.533822 | -1.257851 |
| 21 | 1 | -0.801167 | -2.621321 | -1.268129 |
| 22 | 1 | -1.256402 | -1.150104 | -2.167490 |
| 23 | 6 | 0.734785  | -1.013671 | -1.248052 |
| 24 | 1 | 1.158229  | -1.423779 | -2.166583 |
| 25 | 6 | 0.060014  | 1.049547  | 0.000000  |
| 26 | 6 | 0.057135  | 2.506961  | 0.000000  |
| 27 | 7 | 0.044744  | 3.653329  | 0.000000  |

Electronic energy E<sub>-</sub>: -482.566706  
 ZPE<sub>-</sub>: 0.235225

**AdNH<sub>2</sub> (S<sub>0</sub>, D<sub>0</sub><sup>\*</sup>)**

|    |   |           |           |           |
|----|---|-----------|-----------|-----------|
| 1  | 6 | -1.007207 | -0.410630 | 1.252734  |
| 2  | 6 | -1.729898 | -0.919899 | 0.000000  |
| 3  | 6 | -1.007207 | -0.410630 | -1.252734 |
| 4  | 6 | -1.007207 | 1.122591  | -1.251523 |
| 5  | 6 | -0.286017 | 1.636125  | 0.000000  |
| 6  | 6 | -1.007207 | 1.122591  | 1.251523  |
| 7  | 6 | 0.436585  | -0.923696 | -1.245202 |
| 8  | 6 | 0.436585  | -0.923696 | 1.245202  |
| 9  | 6 | 1.175449  | -0.423928 | 0.000000  |
| 10 | 6 | 1.155167  | 1.113766  | 0.000000  |
| 11 | 7 | 2.523402  | -0.988783 | 0.000000  |
| 12 | 1 | -1.517968 | -0.776826 | 2.145118  |
| 13 | 1 | -1.751326 | -2.012616 | 0.000000  |
| 14 | 1 | -2.766251 | -0.572311 | 0.000000  |
| 15 | 1 | -1.517968 | -0.776826 | -2.145118 |
| 16 | 1 | -2.034437 | 1.495793  | -1.269582 |
| 17 | 1 | -0.508786 | 1.497109  | -2.149619 |
| 18 | 1 | -0.281265 | 2.727794  | 0.000000  |
| 19 | 1 | -0.508786 | 1.497109  | 2.149619  |
| 20 | 1 | -2.034437 | 1.495793  | 1.269582  |
| 21 | 1 | 0.461560  | -2.015731 | -1.252070 |
| 22 | 1 | 0.964825  | -0.578350 | -2.140280 |
| 23 | 1 | 0.964825  | -0.578350 | 2.140280  |
| 24 | 1 | 0.461560  | -2.015731 | 1.252070  |
| 25 | 1 | 1.691334  | 1.478663  | 0.882046  |
| 26 | 1 | 1.691334  | 1.478663  | -0.882046 |
| 27 | 1 | 3.033864  | -0.659138 | -0.813160 |
| 28 | 1 | 3.033864  | -0.659138 | 0.813160  |

Electronic energy E<sub>n</sub>: -446.031143  
 ZPE<sub>n</sub>: 0.261907  
 Electronic energy E<sub>+\*</sub>: -445.704666

**AdNH<sub>2</sub><sup>+</sup> (D<sub>0</sub>)**

|    |   |           |           |           |
|----|---|-----------|-----------|-----------|
| 1  | 6 | -1.006428 | -0.419592 | 1.255756  |
| 2  | 6 | -1.716175 | -0.941222 | 0.000000  |
| 3  | 6 | -1.006428 | -0.419592 | -1.255756 |
| 4  | 6 | -1.006428 | 1.112858  | -1.256917 |
| 5  | 6 | -0.292746 | 1.606848  | 0.000000  |
| 6  | 6 | -1.006428 | 1.112858  | 1.256917  |
| 7  | 6 | 0.436055  | -0.928521 | -1.278577 |
| 8  | 6 | 0.436055  | -0.928521 | 1.278577  |
| 9  | 6 | 1.162741  | -0.507174 | 0.000000  |
| 10 | 6 | 1.166676  | 1.181703  | 0.000000  |
| 11 | 7 | 2.503374  | -0.821396 | 0.000000  |
| 12 | 1 | -1.510191 | -0.786035 | 2.149500  |
| 13 | 1 | -1.731336 | -2.033051 | 0.000000  |
| 14 | 1 | -2.753892 | -0.605818 | 0.000000  |
| 15 | 1 | -1.510191 | -0.786035 | -2.149500 |
| 16 | 1 | -2.031138 | 1.484883  | -1.263305 |
| 17 | 1 | -0.515111 | 1.495899  | -2.153583 |
| 18 | 1 | -0.245595 | 2.703436  | 0.000000  |
| 19 | 1 | -0.515111 | 1.495899  | 2.153583  |
| 20 | 1 | -2.031138 | 1.484883  | 1.263305  |
| 21 | 1 | 0.453786  | -2.020703 | -1.312349 |
| 22 | 1 | 0.970361  | -0.557283 | -2.157026 |
| 23 | 1 | 0.970361  | -0.557283 | 2.157026  |
| 24 | 1 | 0.453786  | -2.020703 | 1.312349  |
| 25 | 1 | 1.704884  | 1.486432  | 0.895298  |
| 26 | 1 | 1.704884  | 1.486432  | -0.895298 |
| 27 | 1 | 3.030331  | -0.869529 | -0.865247 |
| 28 | 1 | 3.030331  | -0.869529 | 0.865247  |

Electronic energy E<sub>-</sub>: -445.728544  
 ZPE<sub>-</sub>: 0.259657

**1-AdOH (S<sub>0</sub>, D<sub>0</sub><sup>\*</sup>)**

|    |   |           |           |           |
|----|---|-----------|-----------|-----------|
| 1  | 6 | 0.718901  | 0.726889  | 1.247927  |
| 2  | 1 | 0.214478  | 1.120642  | 2.133429  |
| 3  | 1 | 1.746800  | 1.105601  | 1.256168  |
| 4  | 6 | 0.000104  | 1.244697  | 0.000000  |
| 5  | 6 | 0.718901  | -0.806829 | 1.253742  |
| 6  | 1 | 1.232106  | -1.168912 | 2.146231  |
| 7  | 6 | -0.730255 | -1.308328 | 1.251377  |
| 8  | 1 | -1.246691 | -0.961022 | 2.149735  |
| 9  | 1 | -0.745412 | -2.401083 | 1.267780  |
| 10 | 6 | -1.439404 | 0.739406  | 0.000000  |
| 11 | 1 | -1.949784 | 1.134064  | -0.881555 |
| 12 | 1 | -1.949784 | 1.134064  | 0.881555  |
| 13 | 6 | -1.451952 | -0.793423 | 0.000000  |
| 14 | 1 | -2.484105 | -1.147394 | 0.000000  |
| 15 | 6 | -0.730255 | -1.308328 | -1.251377 |
| 16 | 1 | -0.745412 | -2.401083 | -1.267780 |
| 17 | 1 | -1.246691 | -0.961022 | -2.149735 |
| 18 | 6 | 0.718901  | 0.726889  | -1.247927 |
| 19 | 1 | 1.746800  | 1.105601  | -1.256168 |
| 20 | 1 | 0.214478  | 1.120642  | -2.133429 |
| 21 | 6 | 1.437925  | -1.319487 | 0.000000  |
| 22 | 1 | 2.477140  | -0.980126 | 0.000000  |
| 23 | 1 | 1.452430  | -2.412307 | 0.000000  |
| 24 | 6 | 0.718901  | -0.806829 | -1.253742 |
| 25 | 1 | 1.232106  | -1.168912 | -2.146231 |
| 26 | 8 | -0.068448 | 2.662931  | 0.000000  |
| 27 | 1 | 0.828532  | 3.009867  | 0.000000  |

Electronic energy E<sub>n</sub>: -465.913164  
 ZPE<sub>n</sub>: 0.249139  
 Electronic energy E<sub>+\*</sub>: -465.562534

**1-AdOH<sup>+</sup> (D<sub>0</sub>)**

|    |   |           |           |           |
|----|---|-----------|-----------|-----------|
| 1  | 6 | -0.759568 | -1.322908 | -0.603661 |
| 2  | 1 | -1.147829 | -1.460201 | -1.620501 |
| 3  | 1 | -1.161658 | -2.133660 | 0.009969  |
| 4  | 6 | -1.303575 | 0.013428  | -0.150143 |
| 5  | 6 | 0.769677  | -1.325322 | -0.617532 |
| 6  | 1 | 1.105771  | -2.266484 | -1.050923 |
| 7  | 6 | 1.282465  | -0.144184 | -1.451094 |
| 8  | 1 | 0.928319  | -0.225902 | -2.480431 |
| 9  | 1 | 2.372053  | -0.168437 | -1.485655 |
| 10 | 6 | -0.711508 | 1.234137  | -0.815561 |
| 11 | 1 | -1.097342 | 2.141512  | -0.349459 |
| 12 | 1 | -1.107879 | 1.210480  | -1.838269 |
| 13 | 6 | 0.813935  | 1.178076  | -0.831461 |
| 14 | 1 | 1.180989  | 2.019300  | -1.418171 |
| 15 | 6 | 1.343043  | 1.298148  | 0.605791  |
| 16 | 1 | 2.432600  | 1.284197  | 0.603474  |
| 17 | 1 | 1.025313  | 2.239889  | 1.055623  |
| 18 | 6 | -0.667399 | 0.154294  | 1.558871  |
| 19 | 1 | -1.130535 | -0.706363 | 2.035462  |
| 20 | 1 | -1.106212 | 1.098470  | 1.868258  |
| 21 | 6 | 1.292721  | -1.216454 | 0.822354  |
| 22 | 1 | 0.939650  | -2.054615 | 1.425505  |
| 23 | 1 | 2.381890  | -1.246953 | 0.823089  |
| 24 | 6 | 0.815656  | 0.110965  | 1.407381  |
| 25 | 1 | 1.156046  | 0.194932  | 2.457497  |
| 26 | 8 | -2.622297 | 0.116959  | 0.029754  |
| 27 | 1 | -3.045488 | -0.742907 | 0.176819  |

Electronic energy E<sub>-</sub>: -465.584038  
 ZPE<sub>-</sub>: 0.246060

**2-AdOH (S<sub>0</sub>, D<sub>0</sub><sup>\*</sup>)**

|    |   |           |           |           |
|----|---|-----------|-----------|-----------|
| 1  | 6 | 0.749579  | -1.553609 | -0.706602 |
| 2  | 1 | 1.315291  | -1.703282 | -1.629439 |
| 3  | 1 | 0.522050  | -2.543374 | -0.301229 |
| 4  | 6 | -0.548198 | -0.795999 | -1.012301 |
| 5  | 1 | -1.150940 | -1.370159 | -1.723555 |
| 6  | 6 | 1.584133  | -0.754499 | 0.301466  |
| 7  | 1 | 2.508905  | -1.292855 | 0.517280  |
| 8  | 6 | 1.912013  | 0.623566  | -0.286203 |
| 9  | 1 | 2.499730  | 0.507353  | -1.200940 |
| 10 | 1 | 2.520292  | 1.193533  | 0.421207  |
| 11 | 6 | -0.220501 | 0.582276  | -1.597873 |
| 12 | 1 | -1.142530 | 1.119284  | -1.825663 |
| 13 | 1 | 0.332546  | 0.460740  | -2.532954 |
| 14 | 6 | 0.613673  | 1.381072  | -0.589081 |
| 15 | 1 | 0.850550  | 2.361199  | -1.007061 |
| 16 | 6 | -0.194060 | 1.553929  | 0.702936  |
| 17 | 1 | 0.380782  | 2.133441  | 1.429994  |
| 18 | 1 | -1.117456 | 2.097192  | 0.500169  |
| 19 | 6 | -1.341327 | -0.633081 | 0.289626  |
| 20 | 1 | -1.535029 | -1.627197 | 0.714214  |
| 21 | 6 | 0.777533  | -0.579226 | 1.593607  |
| 22 | 1 | 0.553984  | -1.556366 | 2.030310  |
| 23 | 1 | 1.363367  | -0.022337 | 2.328878  |
| 24 | 6 | -0.521707 | 0.177149  | 1.292977  |
| 25 | 1 | -1.113400 | 0.292830  | 2.202743  |
| 26 | 8 | -2.571755 | 0.046080  | 0.089651  |
| 27 | 1 | -3.080933 | -0.428105 | -0.572478 |

Electronic energy E<sub>n</sub>: -465.908502  
 ZPE<sub>n</sub>: 0.249708  
 Electronic energy E<sub>+\*</sub>: -465.553113

**2-AdOH<sup>+</sup> (D<sub>0</sub>)**

|    |   |           |           |           |
|----|---|-----------|-----------|-----------|
| 1  | 6 | 0.763989  | -1.053193 | -1.343775 |
| 2  | 1 | 1.380890  | -0.777510 | -2.211904 |
| 3  | 1 | 0.473639  | -2.094287 | -1.490926 |
| 4  | 6 | -0.416156 | -0.135342 | -1.394699 |
| 5  | 1 | -1.139698 | -0.337684 | -2.183105 |
| 6  | 6 | 1.569272  | -0.855181 | -0.056111 |
| 7  | 1 | 2.467212  | -1.468819 | -0.098438 |
| 8  | 6 | 1.940392  | 0.622665  | 0.108403  |
| 9  | 1 | 2.574366  | 0.946638  | -0.718988 |
| 10 | 1 | 2.520114  | 0.755127  | 1.023090  |
| 11 | 6 | -0.140020 | 1.307944  | -1.116180 |
| 12 | 1 | -1.058373 | 1.892790  | -1.102341 |
| 13 | 1 | 0.451544  | 1.660578  | -1.973683 |
| 14 | 6 | 0.673151  | 1.481734  | 0.170858  |
| 15 | 1 | 0.936642  | 2.531438  | 0.289258  |
| 16 | 6 | -0.206298 | 1.045782  | 1.353548  |
| 17 | 1 | 0.336671  | 1.183149  | 2.289080  |
| 18 | 1 | -1.112085 | 1.649149  | 1.409704  |
| 19 | 6 | -1.471803 | -0.689751 | 0.023465  |
| 20 | 1 | -1.623331 | -1.729385 | -0.271780 |
| 21 | 6 | 0.693138  | -1.307431 | 1.118706  |
| 22 | 1 | 0.423458  | -2.360769 | 1.018285  |
| 23 | 1 | 1.247478  | -1.207526 | 2.052760  |
| 24 | 6 | -0.553166 | -0.434046 | 1.199906  |
| 25 | 1 | -1.178694 | -0.752467 | 2.048113  |
| 26 | 8 | -2.565107 | 0.067713  | 0.003423  |
| 27 | 1 | -3.293974 | -0.331208 | -0.491243 |

Electronic energy E<sub>-</sub>: -465.581508  
 ZPE<sub>-</sub>: 0.246351

**Uro (S<sub>0</sub>, D<sub>0</sub>\*)**

|    |   |           |           |           |
|----|---|-----------|-----------|-----------|
| 1  | 7 | -0.861281 | -0.861281 | 0.861281  |
| 2  | 6 | 0.000000  | 0.000000  | 1.678142  |
| 3  | 7 | 0.861281  | 0.861281  | 0.861281  |
| 4  | 6 | 0.000000  | 1.678142  | 0.000000  |
| 5  | 7 | -0.861281 | 0.861281  | -0.861281 |
| 6  | 6 | 0.000000  | 0.000000  | -1.678142 |
| 7  | 7 | 0.861281  | -0.861281 | -0.861281 |
| 8  | 6 | 0.000000  | -1.678142 | 0.000000  |
| 9  | 6 | 1.678142  | 0.000000  | 0.000000  |
| 10 | 6 | -1.678142 | 0.000000  | 0.000000  |
| 11 | 1 | 0.627050  | -0.627050 | 2.313762  |
| 12 | 1 | -0.627050 | 0.627050  | 2.313762  |
| 13 | 1 | 0.627050  | 2.313762  | -0.627050 |
| 14 | 1 | -0.627050 | 2.313762  | 0.627050  |
| 15 | 1 | -0.627050 | -0.627050 | -2.313762 |
| 16 | 1 | 0.627050  | 0.627050  | -2.313762 |
| 17 | 1 | -0.627050 | -2.313762 | -0.627050 |
| 18 | 1 | 0.627050  | -2.313762 | 0.627050  |
| 19 | 1 | 2.313762  | 0.627050  | -0.627050 |
| 20 | 1 | 2.313762  | -0.627050 | 0.627050  |
| 21 | 1 | -2.313762 | -0.627050 | -0.627050 |
| 22 | 1 | -2.313762 | 0.627050  | 0.627050  |

Electronic energy E<sub>n</sub>: -454.812884  
 ZPE<sub>n</sub>: 0.200555  
 Electronic energy E<sub>n</sub>\*: -454.496711

**Uro+ (D<sub>0</sub>)**

|    |   |           |           |           |
|----|---|-----------|-----------|-----------|
| 1  | 7 | 0.000000  | 1.223314  | -0.886194 |
| 2  | 6 | 0.000000  | 0.000000  | -1.704241 |
| 3  | 7 | 0.000000  | -1.223314 | -0.886194 |
| 4  | 6 | -1.164724 | -1.210730 | -0.000650 |
| 5  | 7 | -1.113471 | 0.000000  | 0.833667  |
| 6  | 6 | 0.000000  | 0.000000  | 1.779373  |
| 7  | 7 | 1.113471  | 0.000000  | 0.833667  |
| 8  | 6 | 1.164724  | 1.210730  | -0.000650 |
| 9  | 6 | 1.164724  | -1.210730 | -0.000650 |
| 10 | 6 | -1.164724 | 1.210730  | -0.000650 |
| 11 | 1 | 0.883046  | 0.000000  | -2.340364 |
| 12 | 1 | -0.883046 | 0.000000  | -2.340364 |
| 13 | 1 | -1.164638 | -2.091753 | 0.638291  |
| 14 | 1 | -2.081161 | -1.182578 | -0.587654 |
| 15 | 1 | 0.000000  | 0.899433  | 2.389188  |
| 16 | 1 | 0.000000  | -0.899433 | 2.389188  |
| 17 | 1 | 1.164638  | 2.091753  | 0.638291  |
| 18 | 1 | 2.081161  | 1.182578  | -0.587654 |
| 19 | 1 | 1.164638  | -2.091753 | 0.638291  |
| 20 | 1 | 2.081161  | -1.182578 | -0.587654 |
| 21 | 1 | -1.164638 | 2.091753  | 0.638291  |
| 22 | 1 | -2.081161 | 1.182578  | -0.587654 |

Electronic energy E<sub>n</sub>: -454.514464  
 ZPE<sub>n</sub>: 0.198925
